# Supplementary material
Source: MDPI journal article supplement (https://www.mdpi.com/2297-8739/9/1/17)
Supplement: s1 [file s1 › separations-1527225-supplementary.pdf]

Supplementary Materials

# *Hypericum* spp.—An Overview of the Extraction Methods and Analysis of Compounds

Valentin Ion <sup>1</sup>, Irina Ielciu <sup>2,\*</sup>, Anca-Gabriela Cârje <sup>1</sup>, Daniela Lucia Muntean <sup>1</sup>, Gianina Crişan <sup>2,†</sup> and Ramona Păltinean <sup>2,†</sup>

<sup>1</sup> Department of Analytical Chemistry and Drug Analysis, Faculty of Pharmacy, “George Emil Palade” University of Medicine, Pharmacy, Science and Technology, 540142 Târgu Mureş, Romania; valentin.ion@umfst.ro (V.I.); anca.carje@umfst.ro (A.-G.C.); daniela.muntean@umfst.ro (D.L.M.)

<sup>2</sup> Department of Pharmaceutical Botany, Faculty of Pharmacy, “Iuliu Haţieganu” University of Medicine and Pharmacy, 400010 Cluj-Napoca, Romania; gcrisan@umfcluj.ro (G.C.); rpaltinean@umfcluj.ro (R.P.)

\* Correspondence: irina.ielciu@umfcluj.ro

† These authors contributed equally to this work.

Supplementary Tables S1–S3.

**Citation:** Ion, V.; Ielciu, I.; Cârje, A.-G.; Muntean, D.L.; Crişan, G.; Păltinean, R. *Hypericum* spp.—An Overview of the Extraction Methods and Analysis of Compounds. *Separations* **2022**, *9*, 17. <https://doi.org/10.3390/separations9010017>

Academic Editors: Daniele Naviglio and Federica Bianchi

Received: 11 December 2021

Accepted: 11 January 2022

Published: 14 January 2022

**Publisher’s Note:** MDPI stays neutral with regard to jurisdictional claims in published maps and institutional affiliations.

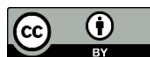

**Copyright:** © 2022 by the authors. Licensee MDPI, Basel, Switzerland. This article is an open access article distributed under the terms and conditions of the Creative Commons Attribution (CC BY) license (<https://creativecommons.org/licenses/by/4.0/>).

**Table S1.** HPLC and UHPLC techniques for the analysis of Hypericum Species.

| HPLC and UHPLC Techniques |                                                                                                                                                                           |                                                               |                                                                                                                                                       |                                                                                                                                                                                                                                                          |                                                                                                 |                                                                                                                                                               |                                  |                                                                   |      |
|---------------------------|---------------------------------------------------------------------------------------------------------------------------------------------------------------------------|---------------------------------------------------------------|-------------------------------------------------------------------------------------------------------------------------------------------------------|----------------------------------------------------------------------------------------------------------------------------------------------------------------------------------------------------------------------------------------------------------|-------------------------------------------------------------------------------------------------|---------------------------------------------------------------------------------------------------------------------------------------------------------------|----------------------------------|-------------------------------------------------------------------|------|
| No.                       | Plant<br>(plant parts)                                                                                                                                                    | Class of<br>Compounds                                         | Compounds<br>Specific                                                                                                                                 | Application                                                                                                                                                                                                                                              | Chromatographic column<br>Chemistry, length X<br>diameter (mm X mm),<br>particle dimension (µm) | Mobile Phase                                                                                                                                                  | Analysis<br>time<br>(min.)       | Detection                                                         | Ref. |
| 1.                        | <i>H. aciculare</i><br><i>H. andinum</i><br><i>H. brevistylum</i><br><i>H. decandrum</i><br><i>H. laricifolium</i><br><i>H. silenoides</i><br>(flowering aerial<br>parts) | acylphloroglucinol<br>derivatives                             | uliginosin A<br>isouliginosin B<br>isohyperbrasilol<br>uliginosin B<br>hyperbrasilol B                                                                | Assay the<br>antichemotactic activity,<br>in the in vitro lipopoly-<br>saccharide-induced<br>chemotaxis on rat<br>polymorphonuclear<br>neutrophils (PMNs)<br>cells, of lipophilic<br>extracts of six Peruvian<br><i>Hypericum</i> species                | C18, 150 X 3.9, 4                                                                               | A-Water<br>B-Acetonitrile<br>and Methanol 8:2                                                                                                                 | 25                               | UV-VIS, DAD<br>detector, scan<br>between<br>190-400 nm,<br>350 nm | [59] |
| 2.                        | <i>H. foliosum</i><br><i>H. androsaemum</i><br><i>H. perforatum</i><br>(aerial parts)                                                                                     | phenolic acids<br>flavonoids<br>phloroglulinol<br>derivatives | quinic scid<br>chloro- genic<br>acid<br>miquelianin<br>amentoflavones<br>3,4<br>dimethylbenzoic<br>acid<br>(+) catechin<br>quercetin-3-O-sulp<br>hate | <i>In vivo</i> evaluation of<br>antidepressant activity<br>of a <i>H. foliosum</i> <i>H.</i><br><i>androsaemum</i> and <i>H.</i><br><i>perforatum</i> extracts, the<br>pre-clinical safety data<br>and the major marker<br>compounds identified<br>on it | Method A – RP, 150 X 3.9, 5<br>Method B – Phenyl 150 X<br>3.9, 5                                | Method A -<br>trifluoroacetic<br>acid acid<br>0.05 % in water,<br>acetonitrile,<br>methanol<br>Method B -<br>trifluoroacetic<br>acid acid<br>0.05 % in water, | Method A<br>90<br>Method B<br>70 | UV-VIS,<br>DAD detector,<br>scan between<br>210 and 450<br>nm     | [36] |



| HPLC and UHPLC Techniques |                                                                                                                |                              |                                                                                                                                                                                                                   |                                                                                                                                            |                                                                                                 |                                                                                                                                                                              |                            |                                                                                                                                                                                                          |         |
|---------------------------|----------------------------------------------------------------------------------------------------------------|------------------------------|-------------------------------------------------------------------------------------------------------------------------------------------------------------------------------------------------------------------|--------------------------------------------------------------------------------------------------------------------------------------------|-------------------------------------------------------------------------------------------------|------------------------------------------------------------------------------------------------------------------------------------------------------------------------------|----------------------------|----------------------------------------------------------------------------------------------------------------------------------------------------------------------------------------------------------|---------|
| No.                       | Plant<br>(plant parts)                                                                                         | Class of<br>Compounds        | Compounds<br>Specific                                                                                                                                                                                             | Application                                                                                                                                | Chromatographic column<br>Chemistry, length X<br>diameter (mm X mm),<br>particle dimension (µm) | Mobile Phase                                                                                                                                                                 | Analysis<br>time<br>(min.) | Detection                                                                                                                                                                                                | Ref.    |
|                           | <i>H. myriandra</i><br><i>H. adenosepalum</i><br>(leaves and<br>stems)                                         |                              | hypericin<br>protohypericin<br>total hypericins<br>phloroglucinols<br>chlorogenic acid<br>catechin<br>naringenin<br>naringin<br>rutin<br>hyperoside<br>isoquercetin<br>quercitrin<br>kaempferol-3-O-gl<br>ucoside |                                                                                                                                            | chlorogenic acid and<br>flavonoid content<br>C18, 150 X 4.6, 5                                  | trifluoroacetic<br>acid<br>B-acetonitrile<br>or<br>A-5 %<br>acetonitrile in<br>water, pH=2.7<br>adjusted with<br>trifluoroacetic<br>acid<br>B-80 %<br>acetonitrile<br>pH=2.7 |                            | 440 nm for<br>emodin<br>590 nm for<br>hypericin<br>270 nm for<br>phloroglucinol<br>s<br>229 nm for<br>(+)-catechin,<br>naringenin,<br>and naringin<br>254 nm for<br>chlorogenic<br>acid and<br>flavonols |         |
| 6.                        | <i>H. perforatum</i><br><i>H. perfoliatum</i><br><i>H. tomentosum</i><br><i>H. ericoides</i><br>(aerial parts) | tocopherols                  | $\alpha$ -tocopherol<br>$\gamma$ -tocopherol<br>$\delta$ -tocopherol                                                                                                                                              | Investigation and<br>quantification of fatty<br>acid composition and<br>tocopherol content in<br>four Tunisian <i>Hypericum</i><br>species | C18, 250 X 4.6, 5                                                                               | A-methanol<br>B-acetonitrile                                                                                                                                                 | -                          | UV-VIS<br>DAD<br>detection<br>292 nm                                                                                                                                                                     | [66]    |
| 7.                        | <i>H. perforatum</i><br>(dried tissue)                                                                         | phenolic acids<br>flavonoids | chlorogenic acid<br>rutin                                                                                                                                                                                         | Genetic diversity of<br><i>Hypericum perforatum</i> in                                                                                     | C18, 250 X 4.6, 5                                                                               | A-0.01 % (V/V)<br>phosphoric acid                                                                                                                                            | 55                         | UV-VIS<br>DAD detector                                                                                                                                                                                   | [39,88] |

| HPLC and UHPLC Techniques |                                                                            |                                                        |                                                                                                                                                                                                                                                   |                                                                                                                       |                                                                                                 |                                                                                                                                                                                                                                                |                                                 |                                                                          |      |
|---------------------------|----------------------------------------------------------------------------|--------------------------------------------------------|---------------------------------------------------------------------------------------------------------------------------------------------------------------------------------------------------------------------------------------------------|-----------------------------------------------------------------------------------------------------------------------|-------------------------------------------------------------------------------------------------|------------------------------------------------------------------------------------------------------------------------------------------------------------------------------------------------------------------------------------------------|-------------------------------------------------|--------------------------------------------------------------------------|------|
| No.                       | Plant<br>(plant parts)                                                     | Class of<br>Compounds                                  | Compounds<br>Specific                                                                                                                                                                                                                             | Application                                                                                                           | Chromatographic column<br>Chemistry, length X<br>diameter (mm X mm),<br>particle dimension (µm) | Mobile Phase                                                                                                                                                                                                                                   | Analysis<br>time<br>(min.)                      | Detection                                                                | Ref. |
|                           | plant ground to<br>powder)                                                 |                                                        | hyperoside<br>quercitroside<br>quercetin                                                                                                                                                                                                          | Qinling<br>mountains-China                                                                                            |                                                                                                 | B-methanol<br>C-acetonitrile                                                                                                                                                                                                                   |                                                 | 270-700 nm                                                               |      |
| 8.                        | <i>H. perforatum</i><br>(top of 2/3<br>plants-air-dried<br>plant material) | phenolic acids<br>flavonoids<br>naphthodianthrone<br>s | chlorogenic acid<br>caffeic acid<br>2,4 dihydroxyben-<br>zoic acid<br>neochlorogenic<br>acid<br>isoquercitrin<br>quercitrin<br>avicularin<br>hyperoside<br>rutin<br>(+)-catechin<br>(-)-epicatechin<br>pseudohypericin<br>Hypericin<br>Hyperforin | Altitudinal impacts on<br>chemical content and<br>composition of <i>H.</i><br><i>perforatum</i> in northern<br>Turkey | phenolic acids and<br>flavonoids<br>C18, 250 X 4, 5<br>naphthodiantrones<br>C18, 250 X 4, 5     | phenolic acids<br>and flavonoids<br>A-0.3 %<br>phosphoric acid<br>in water<br>B-0.3 %<br>phosphoric acid<br>in acetonitrile<br>naphthodiantrone<br>s:<br>A-ethyl acetate<br>B-0.1 M natrium<br>dihydrogen<br>phosphate<br>pH=2.0<br>C-methanol | 45<br>and<br>- no time<br>analysis<br>indicated | UV-VIS<br>DAD detector<br>203, 280, 320,<br>360 nm<br>and<br>207, 589 nm | [79] |
| 9.                        | <i>H. perforatum</i> ,<br><i>H. rumeliacum</i><br><i>H. tetrapterum</i>    | anthraquinones<br>and<br>phloroglucinols               | pseudohypericin<br>hypericin<br>and their                                                                                                                                                                                                         | Evaluation of the<br>elicitation potential of<br>cryogenic                                                            | C18, 50 X 3, 2.7                                                                                | A-5mM<br>ammonium<br>acetate                                                                                                                                                                                                                   | 12                                              | UV-VIS<br>270 nm for<br>phloroglucinol                                   | [52] |

| HPLC and UHPLC Techniques |                                                           |                       |                                                                                                                                                       |                                                                                                                                          |                                                                                                 |                                                                                                                                         |                            |                                           |                |
|---------------------------|-----------------------------------------------------------|-----------------------|-------------------------------------------------------------------------------------------------------------------------------------------------------|------------------------------------------------------------------------------------------------------------------------------------------|-------------------------------------------------------------------------------------------------|-----------------------------------------------------------------------------------------------------------------------------------------|----------------------------|-------------------------------------------|----------------|
| No.                       | Plant<br>(plant parts)                                    | Class of<br>Compounds | Compounds<br>Specific                                                                                                                                 | Application                                                                                                                              | Chromatographic column<br>Chemistry, length X<br>diameter (mm X mm),<br>particle dimension (µm) | Mobile Phase                                                                                                                            | Analysis<br>time<br>(min.) | Detection                                 | Ref.           |
|                           | (vegetative parts<br>of <i>in vitro</i> grown<br>species) |                       | protoforms<br>hyperforin,<br>adhyperforin and<br>other unidentified<br>phloroglucinol<br>derivatives<br>HP-phl-1<br>HP-phl-2<br>HR-phl-1,<br>HR-phl-2 | treatment on secondary<br>metabolism of some<br><i>Hypericum</i> species.                                                                |                                                                                                 | B-acetonitrile                                                                                                                          |                            | s<br>590 nm for<br>naphthodianthro<br>nes |                |
| 10.                       | <i>H. calycinum</i><br>(cells cultures)                   | xanthonenes           | -                                                                                                                                                     | Involvement of cytosolic<br>aromatic aldehyde<br>dehydrogenase for<br>xanthone biosynthesis<br>starting from benzoic<br>acid derivatives | C18, 100 X 4.6, 3.5                                                                             | A-1mM formic<br>acid<br>B-Methanol                                                                                                      | 36                         | UV-VIS<br>254 and 292<br>nm               | [54,92,<br>93] |
| 11.                       | <i>H. perforatum</i><br>(air-dried aerial<br>parts)       | naphthodianthrone     | hypericin                                                                                                                                             | The effects of<br>temperatures on growth<br>and Hypericin<br>Biosynthesis and<br>antioxidant capacity                                    | C8, 150 X 4.6, 5                                                                                | A-0.03 M<br>KH <sub>2</sub> PO <sub>4</sub><br>(adjusted to<br>pH=7.0 with 0.5<br>mol/L K <sub>2</sub> HPO <sub>4</sub> )<br>B-methanol | 14                         | UV-VIS<br>588 nm                          | [81]           |
| 12.                       | <i>H. perforatum</i>                                      | naphthodianthrone     | hypericin                                                                                                                                             | Simultaneous                                                                                                                             | C18, 100 X 2.1, 1.7                                                                             | A-10 mM of                                                                                                                              | 13                         | UV-VIS                                    | [32]           |

| HPLC and UHPLC Techniques |                                                                                    |                                                                                  |                                                                                                                                                    |                                                                                                                                                   |                                                                                                 |                                                                                                                                             |                            |                                                                                                                                                                                   |      |
|---------------------------|------------------------------------------------------------------------------------|----------------------------------------------------------------------------------|----------------------------------------------------------------------------------------------------------------------------------------------------|---------------------------------------------------------------------------------------------------------------------------------------------------|-------------------------------------------------------------------------------------------------|---------------------------------------------------------------------------------------------------------------------------------------------|----------------------------|-----------------------------------------------------------------------------------------------------------------------------------------------------------------------------------|------|
| No.                       | Plant<br>(plant parts)                                                             | Class of<br>Compounds                                                            | Compounds<br>Specific                                                                                                                              | Application                                                                                                                                       | Chromatographic column<br>Chemistry, length X<br>diameter (mm X mm),<br>particle dimension (µm) | Mobile Phase                                                                                                                                | Analysis<br>time<br>(min.) | Detection                                                                                                                                                                         | Ref. |
|                           | ( <i>in vitro</i> shoot<br>cultures)                                               | s<br>bisanthrones<br>skyrin derivatives                                          | pseudohypericin<br>protohypericin<br>protopseudohyper<br>icin<br>emodin and skyrin<br>oxyskyrin,<br>iridoskyrin,<br>rubroskyrin and<br>luteoskyrin | determination of<br>naphthodianthrones,<br>emodin, skyrin and new<br>bisanthrones in<br>Hypericum perforatum<br>L. <i>in vitro</i> shoot cultures |                                                                                                 | ammonium<br>acetate acidified<br>with 0.1 %<br>formic acid<br>B-acetonitrile/me<br>thanol (80:20)                                           |                            | 439 nm and<br>590 nm<br>FLD<br>excitation 236<br>nm emission<br>590 nm                                                                                                            |      |
| 13.                       | <i>H. scruglii</i><br><i>H. hircinum</i><br><i>H. perforatum</i><br>(aerial parts) | phenolic acids<br>flavonoid/flavonol<br>s<br>cyclitols<br>naphthodianthrone<br>s | shikimic acid<br>chlorogenic acid<br>hyperoside<br>quercetin<br>quercitrin<br>hypericin                                                            | Phytochemical profile<br>and α-glucosidase<br>inhibitory activity of<br>Sardinian <i>H. scruglii</i> and<br><i>H. hircinum</i>                    | C18, 150 X 4.6, 5                                                                               | A-Water<br>B-methanol<br>C-acetonitrile<br>D-phosphoric<br>acid<br><br>For hypericin:<br>A-acetonitrile<br>B-0.3 % (V/V)<br>phosphoric acid | 25                         | UV-VIS<br>DAD detector<br>Chlorogenic<br>acid,<br>quercetin,<br>hyperoside,<br>quercitrin-340<br>nm<br>Shikimic<br>acid-210 nm<br>FLD<br>Excitation 315<br>nm and<br>emission 590 | [51] |

| HPLC and UHPLC Techniques |                                        |                                                       |                                                                                                                                                                                          |                                                                                                                                                                                |                                                                                                                       |                                                                                                                                                                        |                            |                                                                        |         |
|---------------------------|----------------------------------------|-------------------------------------------------------|------------------------------------------------------------------------------------------------------------------------------------------------------------------------------------------|--------------------------------------------------------------------------------------------------------------------------------------------------------------------------------|-----------------------------------------------------------------------------------------------------------------------|------------------------------------------------------------------------------------------------------------------------------------------------------------------------|----------------------------|------------------------------------------------------------------------|---------|
| No.                       | Plant<br>(plant parts)                 | Class of<br>Compounds                                 | Compounds<br>Specific                                                                                                                                                                    | Application                                                                                                                                                                    | Chromatographic column<br>Chemistry, length X<br>diameter (mm X mm),<br>particle dimension (µm)                       | Mobile Phase                                                                                                                                                           | Analysis<br>time<br>(min.) | Detection<br>nm                                                        | Ref.    |
| 14.                       | <i>H. perforatum</i><br>(aerial parts) | phenolic acids<br>flavonols<br>naphthodianthrone<br>s | chlorogenic acid,<br>quercetin, rutin,<br>pseudohypericin<br>hypericin                                                                                                                   | The effects of abiotic<br>stressors and signal<br>molecules on phenolic<br>composition and<br>antioxidant activities of<br>in vitro regenerated <i>H.</i><br><i>perforatum</i> | C18, 100 X 4.6, 5                                                                                                     | A-0.5 %<br>trifluoroacetic<br>acid<br>B-0.5 %<br>trifluoroacetic<br>acid in<br>acetonitrile                                                                            | 30                         | UV-VIS<br>DAD detector<br>280 nm, 320<br>nm, 370 and<br>520 nm         | [80]    |
| 15.                       | <i>H. perforatum</i><br>(raw material) | phenolic acids<br>flavonoids<br>diterpenes            | hyperforin<br>hypericin<br><br>method 1<br>protocatechuic<br>acid<br>neochlorogenic<br>acid<br>nhlorogenic acid<br>(-)-epicatechin<br>rutin<br>hyperoside<br>isoquercitrin<br>quercitrin | Methods of establishing<br>the authenticity and<br>quality of <i>H. perforatum</i><br>Criteria for quality<br>control, authenticity and<br>stability of preparations.          | phenolic acids, flavonoids<br>and diterpenes:<br>C18, 250 X 2, 5<br>hyperforin and hypericin<br>C18, 50 X 2, monolith | phenolic acids,<br>flavonoids<br>A-acetonitrile<br>B-0.1 % formic<br>acid<br>naphthodianthro<br>nes and<br>phloroglucinols<br>A-acetonitrile<br>B-0.1 % formic<br>acid | 30<br>and<br>25            | UV-VIS<br>DAD detector<br>Scan 1 190-800<br>nm<br>Scan 2 190-800<br>nm | [20,89] |

| HPLC and UHPLC Techniques |                                                                 |                       |                                                                                                                                                                                                                          |                                                                                                                                                                           |                                                                                                                                                                                                        |                                                                                                                                                                                                 |                            |                                                                                                                       |         |
|---------------------------|-----------------------------------------------------------------|-----------------------|--------------------------------------------------------------------------------------------------------------------------------------------------------------------------------------------------------------------------|---------------------------------------------------------------------------------------------------------------------------------------------------------------------------|--------------------------------------------------------------------------------------------------------------------------------------------------------------------------------------------------------|-------------------------------------------------------------------------------------------------------------------------------------------------------------------------------------------------|----------------------------|-----------------------------------------------------------------------------------------------------------------------|---------|
| No.                       | Plant<br>(plant parts)                                          | Class of<br>Compounds | Compounds<br>Specific                                                                                                                                                                                                    | Application                                                                                                                                                               | Chromatographic column<br>Chemistry, length X<br>diameter (mm X mm),<br>particle dimension (µm)                                                                                                        | Mobile Phase                                                                                                                                                                                    | Analysis<br>time<br>(min.) | Detection                                                                                                             | Ref.    |
|                           |                                                                 |                       | quercetin<br>I3,II8-biapigenin                                                                                                                                                                                           |                                                                                                                                                                           |                                                                                                                                                                                                        |                                                                                                                                                                                                 |                            |                                                                                                                       |         |
|                           |                                                                 |                       | method 2<br>furohyperforin<br>hyperforin<br>adhyperforin<br>pseudohypericin<br>hypericin                                                                                                                                 |                                                                                                                                                                           |                                                                                                                                                                                                        |                                                                                                                                                                                                 |                            |                                                                                                                       |         |
| 16.                       | <i>H. perforatum</i><br><i>H. canariense</i><br>(entire plants) | multiple classes      | gallic acid<br>protocatechuic<br>acid<br>protocatechuic<br>aldehyde<br>p-OH-benzoic acid<br>p-OH-benzoic<br>aldehyde<br>vanillic acid<br>vanillin<br>syringic acid<br>salicylic acid<br>chlorogenic acid<br>caffeic acid | Alteration of phenolic<br>metabolism differed<br>species-specifically via<br>PAL -<br>(phenylalanine<br>ammonia-lyase)<br><br>Quantitative changes of<br>free amino acids | measurement of<br><i>Hypericum</i> -specific<br>metabolites<br>(naphthodiantrones and<br>phloroglucinols)<br>C18, 30 X 2.1, 1.8<br><br>amino-acids<br>zorbax eclipse for amino<br>acids-150 X 4. 6 3.5 | hypericum-specif<br>ic metabolites<br>(naphthodiantron<br>es and<br>phloroglucinols)<br>A-water<br>B-acetonitrile<br><br>amino-acids<br>A-40 mM<br>Na2HPO4,<br>pH=7.8<br>B-<br>acetonitrile/MeO | 3.3<br>and<br>26           | MS<br>UV-VIS<br>FLD for<br>amino-acids<br>with o-<br>phthalaldehyd<br>e and<br>9-fluorenylmet<br>hyl<br>chloroformate | [90,91] |

| HPLC and UHPLC Techniques |                        |                       |                        |             |                                                                                                 |                  |                            |           |      |
|---------------------------|------------------------|-----------------------|------------------------|-------------|-------------------------------------------------------------------------------------------------|------------------|----------------------------|-----------|------|
| No.                       | Plant<br>(plant parts) | Class of<br>Compounds | Compounds<br>Specific  | Application | Chromatographic column<br>Chemistry, length X<br>diameter (mm X mm),<br>particle dimension (µm) | Mobile Phase     | Analysis<br>time<br>(min.) | Detection | Ref. |
|                           |                        |                       | ferulic acid           |             |                                                                                                 | H/water 45/45/10 |                            |           |      |
|                           |                        |                       | p-coumaric acid        |             |                                                                                                 | (v/v)            |                            |           |      |
|                           |                        |                       | sinapic acid           |             |                                                                                                 |                  |                            |           |      |
|                           |                        |                       | quercitrin             |             |                                                                                                 |                  |                            |           |      |
|                           |                        |                       | hyperoside             |             |                                                                                                 |                  |                            |           |      |
|                           |                        |                       | astragalin             |             |                                                                                                 |                  |                            |           |      |
|                           |                        |                       | rutin                  |             |                                                                                                 |                  |                            |           |      |
|                           |                        |                       | luteolin-7-O-glucoside |             |                                                                                                 |                  |                            |           |      |
|                           |                        |                       | apigenin-7-O-glucoside |             |                                                                                                 |                  |                            |           |      |
|                           |                        |                       | eriodictyol-chalcone   |             |                                                                                                 |                  |                            |           |      |
|                           |                        |                       | aspartic acid          |             |                                                                                                 |                  |                            |           |      |
|                           |                        |                       | glutamic acid          |             |                                                                                                 |                  |                            |           |      |
|                           |                        |                       | serine                 |             |                                                                                                 |                  |                            |           |      |
|                           |                        |                       | histidine              |             |                                                                                                 |                  |                            |           |      |
|                           |                        |                       | glycine                |             |                                                                                                 |                  |                            |           |      |
|                           |                        |                       | threonine              |             |                                                                                                 |                  |                            |           |      |
|                           |                        |                       | arginine               |             |                                                                                                 |                  |                            |           |      |
|                           |                        |                       | alanine                |             |                                                                                                 |                  |                            |           |      |

| HPLC and UHPLC Techniques |                                        |                                                                |                                                                                                             |                                                                                       |                                                                                                 |                                                                                                                                                                    |                            |                                                            |      |
|---------------------------|----------------------------------------|----------------------------------------------------------------|-------------------------------------------------------------------------------------------------------------|---------------------------------------------------------------------------------------|-------------------------------------------------------------------------------------------------|--------------------------------------------------------------------------------------------------------------------------------------------------------------------|----------------------------|------------------------------------------------------------|------|
| No.                       | Plant<br>(plant parts)                 | Class of<br>Compounds                                          | Compounds<br>Specific                                                                                       | Application                                                                           | Chromatographic column<br>Chemistry, length X<br>diameter (mm X mm),<br>particle dimension (µm) | Mobile Phase                                                                                                                                                       | Analysis<br>time<br>(min.) | Detection                                                  | Ref. |
|                           |                                        |                                                                | tyrosine<br>cysteine<br>valine<br>methionine<br>Phenylalanine<br>isoleucine<br>leucine<br>lysine<br>proline |                                                                                       |                                                                                                 |                                                                                                                                                                    |                            |                                                            |      |
| 17.                       | <i>H. perforatum</i><br>(the top 6 cm) | flavonoids<br>acylphloroglucinol<br>derivatives<br>tocopherols | quercetin<br>kaempferol<br>I3, II8-biapigenin<br>hyperforin<br>adhyperforin<br>α, β, δ,<br>σ-tocopherols    | Characterization of <i>H. perforatum</i> macerates prepared with different fatty oils | C18, 50 X 2.1, 1.9                                                                              | flavonoids and<br>acylphloroglucinol derivatives:<br>A-0.1 % formic acid<br>B-0.1 % formic acid in acetonitrile<br><br>tocopherols<br>A-methanol<br>B-acetonitrile | 21.3<br>-                  | UV-VIS<br>DAD detector<br>270 nm, 370 nm<br>295 nm, 299 nm | [63] |

| HPLC and UHPLC Techniques |                                                                                                                |                                                                            |                                   |                                                                                                                                                                                        |                                                                                                 |                                                                                            |                            |                                                   |      |
|---------------------------|----------------------------------------------------------------------------------------------------------------|----------------------------------------------------------------------------|-----------------------------------|----------------------------------------------------------------------------------------------------------------------------------------------------------------------------------------|-------------------------------------------------------------------------------------------------|--------------------------------------------------------------------------------------------|----------------------------|---------------------------------------------------|------|
| No.                       | Plant<br>(plant parts)                                                                                         | Class of<br>Compounds                                                      | Compounds<br>Specific             | Application                                                                                                                                                                            | Chromatographic column<br>Chemistry, length X<br>diameter (mm X mm),<br>particle dimension (µm) | Mobile Phase                                                                               | Analysis<br>time<br>(min.) | Detection                                         | Ref. |
| 18.                       | <i>H. andinum</i><br><i>H. brevistylum</i><br><i>H. silenoides</i><br><i>H. laricifolium</i><br>(aerial parts) | flavonoids<br>naphthodianthrone<br>s<br>dimeric<br>acylphloroglucinol<br>s | chlorogenic acid                  | Phytochemical profiles<br>and antidepressant-like<br>activity-<br>four Peruvian <i>Hypericum</i><br>species                                                                            | RP, 150 X 2.1                                                                                   | A-10 mM<br>ammonium<br>acetate buffer<br>adjusted to<br>pH=5.0 with<br>glacial acetic acid | 50                         | UV-VIS<br>DAD detector<br>multiple<br>wavelengths | [26] |
|                           |                                                                                                                |                                                                            | rutin                             |                                                                                                                                                                                        |                                                                                                 |                                                                                            |                            |                                                   |      |
|                           |                                                                                                                |                                                                            | hyperoside                        |                                                                                                                                                                                        |                                                                                                 |                                                                                            |                            |                                                   |      |
|                           |                                                                                                                |                                                                            | guaijaverin                       |                                                                                                                                                                                        |                                                                                                 |                                                                                            |                            |                                                   |      |
|                           |                                                                                                                |                                                                            | quercetin                         |                                                                                                                                                                                        |                                                                                                 |                                                                                            |                            |                                                   |      |
|                           |                                                                                                                |                                                                            | phloroglucinols                   |                                                                                                                                                                                        |                                                                                                 |                                                                                            |                            |                                                   |      |
|                           |                                                                                                                |                                                                            | uliginosin                        |                                                                                                                                                                                        |                                                                                                 |                                                                                            |                            |                                                   |      |
|                           |                                                                                                                |                                                                            | isouliginosin                     |                                                                                                                                                                                        |                                                                                                 |                                                                                            |                            |                                                   |      |
|                           |                                                                                                                |                                                                            | isohyperbrasilol                  |                                                                                                                                                                                        |                                                                                                 |                                                                                            |                            |                                                   |      |
|                           |                                                                                                                |                                                                            | uliginosin B                      |                                                                                                                                                                                        |                                                                                                 |                                                                                            |                            |                                                   |      |
| 19.                       | <i>H. laricifolium</i> ,<br><i>H. quitense</i><br><i>H. decandrum</i><br>(plant parts)                         | multiple<br>compounds                                                      | Chromatographic<br>fingerprinting | Developing a predictive<br>model for the<br>antibacterial potential of<br>the genus <i>Hypericum</i><br>using chromatographic<br>fingerprinting with three<br><i>Hypericum</i> species | C18, 100 X 4.6,<br>monolithic column                                                            | A-0.1 %<br>phosphoric acid<br>in water<br>B-acetonitrile                                   | 50 min                     | UV-VIS<br>DAD<br>254, 280 and<br>360 nm           | [77] |
|                           |                                                                                                                |                                                                            |                                   |                                                                                                                                                                                        |                                                                                                 |                                                                                            |                            |                                                   |      |
|                           |                                                                                                                |                                                                            |                                   |                                                                                                                                                                                        |                                                                                                 |                                                                                            |                            |                                                   |      |
|                           |                                                                                                                |                                                                            |                                   |                                                                                                                                                                                        |                                                                                                 |                                                                                            |                            |                                                   |      |
|                           |                                                                                                                |                                                                            |                                   |                                                                                                                                                                                        |                                                                                                 |                                                                                            |                            |                                                   |      |
|                           |                                                                                                                |                                                                            |                                   |                                                                                                                                                                                        |                                                                                                 |                                                                                            |                            |                                                   |      |
|                           |                                                                                                                |                                                                            |                                   |                                                                                                                                                                                        |                                                                                                 |                                                                                            |                            |                                                   |      |
|                           |                                                                                                                |                                                                            |                                   |                                                                                                                                                                                        |                                                                                                 |                                                                                            |                            |                                                   |      |
|                           |                                                                                                                |                                                                            |                                   |                                                                                                                                                                                        |                                                                                                 |                                                                                            |                            |                                                   |      |
|                           |                                                                                                                |                                                                            |                                   |                                                                                                                                                                                        |                                                                                                 |                                                                                            |                            |                                                   |      |
| 20.                       | <i>H. perforatum</i>                                                                                           | phenolic                                                                   | phenolic acids:                   | Targeted metabolomic                                                                                                                                                                   | phenolic acids                                                                                  | phenolic acids                                                                             | 40                         | UV-VIS                                            | [37] |
|                           | <i>H. maculatum</i>                                                                                            | compounds                                                                  | chlorogenic                       | in the genus                                                                                                                                                                           | flavonoids:                                                                                     | flavonoids:                                                                                | and                        | DAD detectors                                     |      |

| HPLC and UHPLC Techniques |                            |                       |                       |                                                     |                                                                                                 |                  |                            |                         |      |
|---------------------------|----------------------------|-----------------------|-----------------------|-----------------------------------------------------|-------------------------------------------------------------------------------------------------|------------------|----------------------------|-------------------------|------|
| No.                       | Plant<br>(plant parts)     | Class of<br>Compounds | Compounds<br>Specific | Application                                         | Chromatographic column<br>Chemistry, length X<br>diameter (mm X mm),<br>particle dimension (µm) | Mobile Phase     | Analysis<br>time<br>(min.) | Detection               | Ref. |
|                           | <i>H. tetrapterum</i>      | anthraquinones        | caffeic               | <i>Hypericum</i> in response to<br>biotic elicitors | C18, 150×4.6 mm, 5                                                                              | A-5 %            | 20                         | multiple<br>wavelengths |      |
|                           | <i>H. erectum</i>          | phloroglucinols       | ferulic               |                                                     |                                                                                                 | acetonitrile     |                            |                         |      |
|                           | <i>H. humifusum</i>        | flavonoids            | cinnamic              |                                                     | anthraquinones and                                                                              | pH=2.7           |                            |                         |      |
|                           | <i>H. monogynum</i>        |                       | and gallic acid       |                                                     | phloroglucinols:                                                                                | B-80 %           |                            |                         |      |
|                           | <i>H. kouytchense</i>      |                       |                       |                                                     | C18, 50 × 3, 2.7                                                                                | acetonitrile     |                            |                         |      |
|                           | <i>H. canariense</i>       |                       | flavonoids:           |                                                     |                                                                                                 | pH=2.7           |                            |                         |      |
|                           | (in vitro grown<br>plants) |                       | naringenin            |                                                     |                                                                                                 |                  |                            |                         |      |
|                           |                            |                       | apigenin              |                                                     |                                                                                                 | anthraquinones   |                            |                         |      |
|                           |                            |                       | amentoflavone         |                                                     |                                                                                                 | and              |                            |                         |      |
|                           |                            |                       | kaempferol            |                                                     |                                                                                                 | phloroglucinols: |                            |                         |      |
|                           |                            |                       | kaempferol-3-O-gl     |                                                     |                                                                                                 | A-10 %           |                            |                         |      |
|                           |                            |                       | ucoside               |                                                     |                                                                                                 | acetonitrile, pH |                            |                         |      |
|                           |                            |                       | catechin              |                                                     |                                                                                                 | adjusted to 2.7  |                            |                         |      |
|                           |                            |                       | quercetin             |                                                     |                                                                                                 | with             |                            |                         |      |
|                           |                            |                       | rutin                 |                                                     |                                                                                                 | trifluoroacetic  |                            |                         |      |
|                           |                            |                       | hy-peroside           |                                                     |                                                                                                 | acid             |                            |                         |      |
|                           |                            |                       | quercitrin and        |                                                     |                                                                                                 | B-acetonitrile   |                            |                         |      |
|                           |                            |                       | isoquercetin          |                                                     |                                                                                                 |                  |                            |                         |      |
|                           |                            |                       | anthraquinones:       |                                                     |                                                                                                 |                  |                            |                         |      |
|                           |                            |                       | hypericin             |                                                     |                                                                                                 |                  |                            |                         |      |
|                           |                            |                       | pseudohypericin       |                                                     |                                                                                                 |                  |                            |                         |      |

| HPLC and UHPLC Techniques |                                                                                                                                                           |                                                            |                       |                                                                                                                                                                                   |                                                                                                 |                                                                                                                                                                                   |                            |                            |      |
|---------------------------|-----------------------------------------------------------------------------------------------------------------------------------------------------------|------------------------------------------------------------|-----------------------|-----------------------------------------------------------------------------------------------------------------------------------------------------------------------------------|-------------------------------------------------------------------------------------------------|-----------------------------------------------------------------------------------------------------------------------------------------------------------------------------------|----------------------------|----------------------------|------|
| No.                       | Plant<br>(plant parts)                                                                                                                                    | Class of<br>Compounds                                      | Compounds<br>Specific | Application                                                                                                                                                                       | Chromatographic column<br>Chemistry, length X<br>diameter (mm X mm),<br>particle dimension (µm) | Mobile Phase                                                                                                                                                                      | Analysis<br>time<br>(min.) | Detection                  | Ref. |
| 21.                       | <i>H. androsaemum</i><br><i>H. ericoides</i> ,<br><i>H. moserianum</i><br><i>H. olympicum</i><br>(fresh aerial<br>parts)                                  | flavonoid content                                          | phloroglucinol        | Phytochemical profile,<br>antioxidant and<br>antibacterial activity of<br>four<br><i>Hypericum</i> species from<br>the UK                                                         | C18, 250 X 4.6, 5                                                                               | A-water<br>B-acetonitrile<br>acidified with<br>1 % acetic acid                                                                                                                    | -                          | UV-VIS<br>DAD, 254 nm      | [16] |
|                           |                                                                                                                                                           |                                                            | flavonoid             |                                                                                                                                                                                   |                                                                                                 |                                                                                                                                                                                   |                            |                            |      |
|                           |                                                                                                                                                           |                                                            | aglycones:            |                                                                                                                                                                                   |                                                                                                 |                                                                                                                                                                                   |                            |                            |      |
|                           |                                                                                                                                                           |                                                            | quercetin             |                                                                                                                                                                                   |                                                                                                 |                                                                                                                                                                                   |                            |                            |      |
|                           |                                                                                                                                                           |                                                            | myricetin             |                                                                                                                                                                                   |                                                                                                 |                                                                                                                                                                                   |                            |                            |      |
|                           |                                                                                                                                                           |                                                            | isorhamnetin          |                                                                                                                                                                                   |                                                                                                 |                                                                                                                                                                                   |                            |                            |      |
|                           |                                                                                                                                                           |                                                            | rhamnetin             |                                                                                                                                                                                   |                                                                                                 |                                                                                                                                                                                   |                            |                            |      |
| 22.                       | <i>H. caprifoliatum</i><br><i>H. carinatum</i><br><i>H. linoides</i><br><i>H. myrianthum</i><br><i>H. polyanthemum</i><br>(aerial parts of<br>the plants) | dimeric<br>phloroglucinols<br>benzophenones<br>benzopyrans | uliginosin B          | Antifungal and<br>antichemotactic<br>activities and<br>quantification of<br>phenolic<br>compounds in lipophilic<br>extracts of <i>Hypericum</i><br>spp. native to South<br>Brazil | C18, 150 X 3.9, 4                                                                               | Dimeric<br>phloroglucinols:<br>A-acetonitrile<br>B-0.1 %<br>trifluoroacetic<br>acid in water,<br><br>benzopyrans and<br>benzophenone:s<br>A-60 %<br>acetonitrile,<br>B-40 % water | 10<br>and<br>20            | UV-VIS<br>220 nm<br>270 nm | [58] |
|                           |                                                                                                                                                           |                                                            | hyperbrasilol         |                                                                                                                                                                                   |                                                                                                 |                                                                                                                                                                                   |                            |                            |      |
|                           |                                                                                                                                                           |                                                            | japonicin             |                                                                                                                                                                                   |                                                                                                 |                                                                                                                                                                                   |                            |                            |      |
|                           |                                                                                                                                                           |                                                            | cariphenone A         |                                                                                                                                                                                   |                                                                                                 |                                                                                                                                                                                   |                            |                            |      |
|                           |                                                                                                                                                           |                                                            | cariphenone B         |                                                                                                                                                                                   |                                                                                                 |                                                                                                                                                                                   |                            |                            |      |
|                           |                                                                                                                                                           |                                                            | 6-isobutyryl-5,7-di   |                                                                                                                                                                                   |                                                                                                 |                                                                                                                                                                                   |                            |                            |      |
|                           |                                                                                                                                                           |                                                            | methoxy-2,2-dime      |                                                                                                                                                                                   |                                                                                                 |                                                                                                                                                                                   |                            |                            |      |
|                           |                                                                                                                                                           |                                                            | thyl-benzopyran       |                                                                                                                                                                                   |                                                                                                 |                                                                                                                                                                                   |                            |                            |      |
|                           |                                                                                                                                                           |                                                            | (HP1)                 |                                                                                                                                                                                   |                                                                                                 |                                                                                                                                                                                   |                            |                            |      |
|                           |                                                                                                                                                           |                                                            | 7-hydroxy-6-isobu     |                                                                                                                                                                                   |                                                                                                 |                                                                                                                                                                                   |                            |                            |      |



| HPLC and UHPLC Techniques |                                                                                 |                                                                                         |                                                                                                                         |                                                                                                                                                                |                                                                                                                                                                |                                                                                                                                                                                                                                                                |                            |                                                                                                   |        |
|---------------------------|---------------------------------------------------------------------------------|-----------------------------------------------------------------------------------------|-------------------------------------------------------------------------------------------------------------------------|----------------------------------------------------------------------------------------------------------------------------------------------------------------|----------------------------------------------------------------------------------------------------------------------------------------------------------------|----------------------------------------------------------------------------------------------------------------------------------------------------------------------------------------------------------------------------------------------------------------|----------------------------|---------------------------------------------------------------------------------------------------|--------|
| No.                       | Plant<br>(plant parts)                                                          | Class of<br>Compounds                                                                   | Compounds<br>Specific                                                                                                   | Application                                                                                                                                                    | Chromatographic column<br>Chemistry, length X<br>diameter (mm X mm),<br>particle dimension (µm)                                                                | Mobile Phase                                                                                                                                                                                                                                                   | Analysis<br>time<br>(min.) | Detection                                                                                         | Ref.   |
|                           |                                                                                 |                                                                                         | neochlorogenic<br>acid<br>quercitrin<br>isoquercetin                                                                    |                                                                                                                                                                |                                                                                                                                                                | acid in<br>acetonitrile<br>B-200 mM<br>ammonium<br>acetate                                                                                                                                                                                                     |                            |                                                                                                   |        |
| 26.                       | <i>H. aviculariifolium</i><br><i>H. pruinatum</i><br>(flowering parts<br>parts) | naphthodiantrone<br>s<br>phloroglucinols<br>flavonoids<br>phenolic acids<br>polyphenols | pseudohypericin<br>hyperforin<br>adhyperforin<br>chlorogenic acid<br>neochlorogenic<br>acid<br>(-)-epicatechin<br>rutin | Determining the<br>elicitation effect of<br>jasmonic acid (JA) on the<br>accumulation of<br>secondary metabolites in<br>vitro regenerated<br>flowering plants. | flavonoids and<br>phloroglucinols:<br>RP, 150 X 4.6, 3<br><br>catechin and phenolic acids:<br>C18, 250 X 4.6, 5<br><br>naphthodianthrone:<br>C18, 150 X 4.6, 5 | flavonoids,<br>epicatechin and<br>hyperforin:<br>A-0.3 %<br>phosphoric acid<br>in water<br>B-0.3 %<br>phosphoric acid<br>in acetonitrile<br>phenolic acids<br>and catechins:<br>A-0.5 % acetic<br>acid in water<br>B-methanol<br><br>naphthodianthrone:<br>es: | 30<br>and<br>37            | UV-VIS<br>DAD detector<br>324 nm<br>catechin and<br>phenolic acids<br>naphthodianthrone<br>590 nm | [5,44] |

| HPLC and UHPLC Techniques |                                        |                                                        |                                               |                                                                                                                 |                                                                                                                |                                                                                                                                                                                                                |                            |                                            |      |
|---------------------------|----------------------------------------|--------------------------------------------------------|-----------------------------------------------|-----------------------------------------------------------------------------------------------------------------|----------------------------------------------------------------------------------------------------------------|----------------------------------------------------------------------------------------------------------------------------------------------------------------------------------------------------------------|----------------------------|--------------------------------------------|------|
| No.                       | Plant<br>(plant parts)                 | Class of<br>Compounds                                  | Compounds<br>Specific                         | Application                                                                                                     | Chromatographic column<br>Chemistry, length X<br>diameter (mm X mm),<br>particle dimension (µm)                | Mobile Phase                                                                                                                                                                                                   | Analysis<br>time<br>(min.) | Detection                                  | Ref. |
|                           |                                        |                                                        |                                               |                                                                                                                 |                                                                                                                | A-ethyl acetate<br>B-0.1 M sodium<br>dihydrogen<br>phosphate<br>solution adjusted<br>to pH 2.0 using<br>phosphoric acid<br>C-methanol                                                                          |                            |                                            |      |
| 27.                       | <i>H. perforatum</i><br>(aerial parts) | naphthodianthron<br>es<br>phloroglucine<br>derivatives | hypericine<br>hyperforine<br>pseudohypericine | Comparative analysis of<br>naphthodianthrone and<br>phloroglucine<br>derivatives in St. John's<br>Wort extracts | C18, 250 X 4,5<br>tested to allow for<br>separation with highest<br>possible peak shape<br>at best resolution. | optimised buffer<br>systems<br>A-aqueous with<br>phosphoric acid<br>and<br>triethylamine<br>B-organic,<br>different<br>acetonitrile and<br>methanol<br>mixtures with<br>fosphoric acid<br>and<br>triethylamine | 60                         | UV-VIS<br>UV detection<br>292 nm<br>591 nm | [87] |

| HPLC and UHPLC Techniques |                                                                                              |                                                                                                |                                                                                                                                                                                                                                                                                                              |                                                                                                                  |                                                                                                                                                                                                         |                                                                                                                                                                                                                                                                                                                         |                            |                                                           |      |
|---------------------------|----------------------------------------------------------------------------------------------|------------------------------------------------------------------------------------------------|--------------------------------------------------------------------------------------------------------------------------------------------------------------------------------------------------------------------------------------------------------------------------------------------------------------|------------------------------------------------------------------------------------------------------------------|---------------------------------------------------------------------------------------------------------------------------------------------------------------------------------------------------------|-------------------------------------------------------------------------------------------------------------------------------------------------------------------------------------------------------------------------------------------------------------------------------------------------------------------------|----------------------------|-----------------------------------------------------------|------|
| No.                       | Plant<br>(plant parts)                                                                       | Class of<br>Compounds                                                                          | Compounds<br>Specific                                                                                                                                                                                                                                                                                        | Application                                                                                                      | Chromatographic column<br>Chemistry, length X<br>diameter (mm X mm),<br>particle dimension (µm)                                                                                                         | Mobile Phase                                                                                                                                                                                                                                                                                                            | Analysis<br>time<br>(min.) | Detection                                                 | Ref. |
|                           |                                                                                              |                                                                                                |                                                                                                                                                                                                                                                                                                              |                                                                                                                  |                                                                                                                                                                                                         | additives                                                                                                                                                                                                                                                                                                               |                            |                                                           |      |
| 28.                       | <i>H. androsaemum</i><br><i>H. polyphyllum</i><br>(flowering<br>air-dried plant<br>material) | naphthodianthrone<br>phloroglucinol<br>derivatives<br>phenolic acids<br>biflavone<br>flavonols | hypericin<br>pseudohypericin<br>hyperforin<br>adhyperforin<br>chlorogenic acid<br>neochlorogenic<br>acid<br>caffeic acid<br>2,4-dihydroxybenzoic acid<br>biflavone,<br>13,II8-biapigenin<br>hyperoside<br>isoquercitrin<br>quercitrin<br>quercetin<br>avicularin<br>rutin<br>(+)-catechin<br>(-)-epicatechin | Altitudinal changes in<br>secondary metabolite<br>contents of<br><i>H. androsaemum</i> and <i>H. polyphyllum</i> | separation of flavonoids,<br>epicatechin<br>hyperforin:<br>C18, 150 X 3, 3.5<br>dihydroxybenzoic acid, and<br>caffeic acid derivatives"<br>C18, 250 X 4.6, 5<br>naphthodiantrones:<br>C18, 150 X 4.6, 5 | separation of<br>flavonoids,<br>epicatechin<br>hyperforin:<br>A-0.3 %<br>phosphoric acid<br>B-0.3 %<br>phosphoric acid<br>in acetonitrile<br>catechin,<br>catechin,<br>dihydroxybenzoic acid, and<br>caffeic acid<br>derivatives:<br>A-0.5 % glacial<br>acetic acid in<br>water)<br>B-acetonitrile<br>for separation of | 30<br>37<br>15             | UV-VIS<br>PDA/DAD<br>detector,<br>multiple<br>wavelengths | [45] |

| HPLC and UHPLC Techniques |                        |                       |                       |                                                                                                                                 |                                                                                                 |                                                                                                                                     |                            |                                  |      |
|---------------------------|------------------------|-----------------------|-----------------------|---------------------------------------------------------------------------------------------------------------------------------|-------------------------------------------------------------------------------------------------|-------------------------------------------------------------------------------------------------------------------------------------|----------------------------|----------------------------------|------|
| No.                       | Plant<br>(plant parts) | Class of<br>Compounds | Compounds<br>Specific | Application                                                                                                                     | Chromatographic column<br>Chemistry, length X<br>diameter (mm X mm),<br>particle dimension (µm) | Mobile Phase                                                                                                                        | Analysis<br>time<br>(min.) | Detection                        | Ref. |
|                           |                        |                       |                       |                                                                                                                                 |                                                                                                 | dihydroxybenzoic acid and catechin; 100% methanol for elution of caffeic acid derivatives                                           |                            |                                  |      |
|                           |                        |                       |                       |                                                                                                                                 |                                                                                                 | naphthodiantrones:<br>A-ethyl acetate<br>B-buffer sodium dihydrogen phosphate adjusted to pH=2.0 with phosphoric acid<br>C-methanol |                            |                                  |      |
| 29.                       | <i>H. perforatum</i>   | naphthodiantrones     | hypericin             | Combined effect of elevated CO <sub>2</sub> and temperature on growth, biomass and secondary metabolite of <i>H. perforatum</i> | C18, 250 X 4.6, 5                                                                               | A-5mM ammonium acetate in water<br>B-acetonitrile<br>B-methanol                                                                     | 20                         | UV-VIS<br>PDA detector<br>589 nm | [43] |

| HPLC and UHPLC Techniques |                         |                       |                                                                                |                                                                                          |                                                                                                 |                                        |                            |                            |      |
|---------------------------|-------------------------|-----------------------|--------------------------------------------------------------------------------|------------------------------------------------------------------------------------------|-------------------------------------------------------------------------------------------------|----------------------------------------|----------------------------|----------------------------|------|
| No.                       | Plant<br>(plant parts)  | Class of<br>Compounds | Compounds<br>Specific                                                          | Application                                                                              | Chromatographic column<br>Chemistry, length X<br>diameter (mm X mm),<br>particle dimension (μm) | Mobile Phase                           | Analysis<br>time<br>(min.) | Detection                  | Ref. |
| 30.                       |                         |                       | benzophenones<br>cariphenone A<br>cariphenone B                                | Leishmanicidal activity<br>of lipophilic extracts of<br>some <i>Hypericum</i><br>species | C18, 150 X 3.9, 4                                                                               | A-60 %<br>acetonitrile<br>B-40 % water | 24                         | UV-VIS<br>270 nm<br>220 nm | [61] |
|                           | <i>H. andinum</i>       |                       | benzopyrans<br>6-isobutyryl-5,7-<br>dimethoxy-2,2-di                           |                                                                                          |                                                                                                 |                                        |                            |                            |      |
|                           | <i>H. brevistylum</i>   |                       | methyl-benzopyra                                                               |                                                                                          |                                                                                                 |                                        |                            |                            |      |
|                           | <i>H. caprifoliatum</i> | benzophenones         | n                                                                              |                                                                                          |                                                                                                 |                                        |                            |                            |      |
|                           | <i>H. carinatum</i>     | benzopyrans           | 7-hydroxy-6-                                                                   |                                                                                          |                                                                                                 |                                        |                            |                            |      |
|                           | <i>H. linoides</i>      | dimeric               | isobutyryl-5-meth                                                              |                                                                                          |                                                                                                 |                                        |                            |                            |      |
|                           | <i>H. myrianthum</i>    | phloroglucinols       | oxy-2,2-dimethyl-                                                              |                                                                                          |                                                                                                 |                                        |                            |                            |      |
|                           | <i>H. polyanthemum</i>  |                       | benzopyran                                                                     |                                                                                          |                                                                                                 |                                        |                            |                            |      |
|                           | <i>H. silenoides</i>    |                       | 5-dimethoxy-2,2-d                                                              |                                                                                          |                                                                                                 |                                        |                            |                            |      |
|                           | (aerial parts)          |                       | imethyl-benzopyr                                                               |                                                                                          |                                                                                                 |                                        |                            |                            |      |
|                           |                         |                       | an<br>dimeric<br>phloroglu-cinols<br>hyperbrasilol B<br>aponicin<br>uliginosin |                                                                                          |                                                                                                 |                                        |                            |                            |      |
| 31.                       | <i>H. reflexum</i> ,    | phenolic acids        | chlorogenic acid                                                               | Phytochemical analysis                                                                   | C18, 250×4.6mm, 5                                                                               | A-0.02 %                               | 130 min.                   | UV-VIS                     | [19] |
|                           | <i>H. canariense</i>    | flavonoids            | rutin                                                                          | and in vitro biological                                                                  |                                                                                                 | phosphoric acid                        |                            | DAD detector               |      |

| HPLC and UHPLC Techniques |                                                                                                                  |                                                                             |                                                                                                                                                                                                  |                                                                                                             |                                                                                                 |                                                                                   |                            |                                                                     |      |
|---------------------------|------------------------------------------------------------------------------------------------------------------|-----------------------------------------------------------------------------|--------------------------------------------------------------------------------------------------------------------------------------------------------------------------------------------------|-------------------------------------------------------------------------------------------------------------|-------------------------------------------------------------------------------------------------|-----------------------------------------------------------------------------------|----------------------------|---------------------------------------------------------------------|------|
| No.                       | Plant<br>(plant parts)                                                                                           | Class of<br>Compounds                                                       | Compounds<br>Specific                                                                                                                                                                            | Application                                                                                                 | Chromatographic column<br>Chemistry, length X<br>diameter (mm X mm),<br>particle dimension (µm) | Mobile Phase                                                                      | Analysis<br>time<br>(min.) | Detection                                                           | Ref. |
|                           | <i>H. grandifolium</i><br>(top flowering<br>aerial parts)                                                        |                                                                             | hyperoside,<br>isoquercitrin<br>quercetin                                                                                                                                                        | activity of three<br><i>Hypericum</i> species from<br>the Canary Islands                                    |                                                                                                 | pH=2,7)<br>B-acetonitrile/me<br>thanol<br>C-ethyl<br>acetate/mix of<br>eluent A/B |                            | quercitrin-210<br>nm<br>hyperforin-270<br>nm<br>hypericin-590<br>nm |      |
| 32.                       | <i>H. perforatum</i><br><i>H. angustifolium</i><br>(roots)                                                       | xanthon<br>prenylated<br>xanthon                                            | biyouxanthone D<br>1,3,5,6-<br>tetraoxyxanthone<br>1,3,6,7-<br>tetraoxyxanthone<br>1,7-dihydroxyxant<br>hone<br>toxyloxanthone B<br>paxanthone<br>5-O-methyl-2-<br>deprenylrheedi<br>axanthone B | Influence of <i>Hypericum</i><br>roots elicitation with<br>chitosan derivatives                             | -                                                                                               | A-0.1 %<br>phosphoric acid<br>in water<br>B-methanol                              | 70 min                     | UV-VIS<br>260 nm<br>320 nm                                          | [72] |
| 33.                       | <i>H. perforatum</i><br><i>ssp. veronense</i><br><i>H. perfoliatum</i><br><i>H. empetrifolium</i><br><i>ssp.</i> | phenolic acids,<br>flavonoids,<br>naphthodianthron<br>es<br>phloroglucinols | multiple<br>3-O–caffeoylquini<br>c<br>acid<br>quercetin–3-O–gal                                                                                                                                  | Metabolomic<br>fingerprinting and<br>genetic discrimination of<br>four <i>Hypericum</i> taxa<br>from Greece | C18 250 × 4.6, 5,                                                                               | A-10 mM<br>ammonium<br>acetate, pH= 4.5<br>B-acetonitrile<br>C–methanol           | -                          | UV-VIS<br>DAD detector<br>270 nm<br>350 nm<br>590 nm                | [48] |

| HPLC and UHPLC Techniques |                                             |                                                     |                                                                                                                                                                                          |                                                                                                                                               |                                                                                                 |                                                                                                                         |                            |                                                                                                           |      |
|---------------------------|---------------------------------------------|-----------------------------------------------------|------------------------------------------------------------------------------------------------------------------------------------------------------------------------------------------|-----------------------------------------------------------------------------------------------------------------------------------------------|-------------------------------------------------------------------------------------------------|-------------------------------------------------------------------------------------------------------------------------|----------------------------|-----------------------------------------------------------------------------------------------------------|------|
| No.                       | Plant<br>(plant parts)                      | Class of<br>Compounds                               | Compounds<br>Specific                                                                                                                                                                    | Application                                                                                                                                   | Chromatographic column<br>Chemistry, length X<br>diameter (mm X mm),<br>particle dimension (µm) | Mobile Phase                                                                                                            | Analysis<br>time<br>(min.) | Detection                                                                                                 | Ref. |
|                           | <i>empetrifolium</i>                        |                                                     | actoside                                                                                                                                                                                 |                                                                                                                                               |                                                                                                 |                                                                                                                         |                            |                                                                                                           |      |
|                           | <i>H. triquetrifolium</i><br>(aerial parts) |                                                     | quercetin-3-O-glycoside<br>quercetin<br>hypericin                                                                                                                                        |                                                                                                                                               |                                                                                                 |                                                                                                                         |                            |                                                                                                           |      |
|                           |                                             |                                                     | naphthodianthrone:<br>hypericin and<br>pseudohypericin                                                                                                                                   |                                                                                                                                               |                                                                                                 | polyphenols:<br>B-2.5 % formic<br>acid solution in<br>acetonitrile<br>A-2.5 %<br>solution of<br>formic acid in<br>water |                            | UV-VIS<br>Polyphenols:<br>330, 350 nm<br>Phloroglucinols:<br>290 nm<br>Naph-thodiant<br>hrones: 590<br>nm |      |
| 34.                       | <i>H. perforatum</i><br>(dried flowers)     | naphthodianthrone<br>phloroglucinols<br>polyphenols | phloroglucinols<br>hyperforin and<br>adhyperforin<br>flavonols:<br>myricitrin<br>myricetin<br>derivatives<br>quercetin-3-O-rutinoside<br>quercetin-3-O-galactoside<br>quercetin-3-O-gluc | Analysis of bioactive<br>compounds among<br>different <i>H. perforatum</i><br>provenances with<br>the sole effect of year<br>climatic pattern | C18, 250 X 4.6, 5                                                                               | naphthodianthrone and<br>phloroglucinols:<br>B-acetonitrile<br>A-20 mM<br>ammonium<br>acetate in water                  | 50                         |                                                                                                           | [34] |

| HPLC and UHPLC Techniques |                                                                         |                                                       |                                                                                                                                                                                                 |                                                                                            |                                                                                                 |                                              |                            |                            |      |
|---------------------------|-------------------------------------------------------------------------|-------------------------------------------------------|-------------------------------------------------------------------------------------------------------------------------------------------------------------------------------------------------|--------------------------------------------------------------------------------------------|-------------------------------------------------------------------------------------------------|----------------------------------------------|----------------------------|----------------------------|------|
| No.                       | Plant<br>(plant parts)                                                  | Class of<br>Compounds                                 | Compounds<br>Specific                                                                                                                                                                           | Application                                                                                | Chromatographic column<br>Chemistry, length X<br>diameter (mm X mm),<br>particle dimension (µm) | Mobile Phase                                 | Analysis<br>time<br>(min.) | Detection                  | Ref. |
|                           |                                                                         |                                                       | oside quercetin<br>quercitrin                                                                                                                                                                   |                                                                                            |                                                                                                 |                                              |                            |                            |      |
|                           |                                                                         |                                                       | cinnamic acids:<br>3-O-caffeoylquinic<br>acid<br>p-coumaroilquinic<br>acid<br>5-O-caffeoylquinic<br>acid and<br>p-coumaric acid<br>3-O-caffeoylquinic<br>acid and<br>5-O-caffeoylquinic<br>acid |                                                                                            |                                                                                                 |                                              |                            |                            |      |
|                           |                                                                         |                                                       | biflavonoids:<br>biapigenin<br>amentoflavone                                                                                                                                                    |                                                                                            |                                                                                                 |                                              |                            |                            |      |
| 35.                       | <i>H. perforatum</i><br>(apical shoots<br>seedlings and<br>reproductive | naphthodianthron<br>es<br>flavonoids and<br>flavonols | hypericin<br>hyperforin<br>amentoflavone<br>chlorogenic acid                                                                                                                                    | The objective was to<br>assess the possible role<br>of O3 as an elicitor of<br>antioxidant | C18, 150 X 4.6, 5                                                                               | hypericin<br>A-0.1 M<br>triethylammoniu<br>m | 28<br>55                   | UV-VIS<br>270 nm<br>590 nm | [84] |

| HPLC and UHPLC Techniques |                                              |                             |                                                                                                          |                                                                                                                  |                                                                                                                                    |                                                                                                                                            |                            |                                                                                                                                                                      |      |
|---------------------------|----------------------------------------------|-----------------------------|----------------------------------------------------------------------------------------------------------|------------------------------------------------------------------------------------------------------------------|------------------------------------------------------------------------------------------------------------------------------------|--------------------------------------------------------------------------------------------------------------------------------------------|----------------------------|----------------------------------------------------------------------------------------------------------------------------------------------------------------------|------|
| No.                       | Plant<br>(plant parts)                       | Class of<br>Compounds       | Compounds<br>Specific                                                                                    | Application                                                                                                      | Chromatographic column<br>Chemistry, length X<br>diameter (mm X mm),<br>particle dimension (µm)                                    | Mobile Phase                                                                                                                               | Analysis<br>time<br>(min.) | Detection                                                                                                                                                            | Ref. |
|                           | tops)                                        | phenolic acids              | hypericin<br>hyperforin<br>hyperoside<br>isoquercitrin<br>kaempferol<br>quercetin<br>quercitrin<br>rutin | compounds in <i>H.<br/>perforatum</i>                                                                            |                                                                                                                                    | B-acetonitrile<br><br>hyperforin and<br>other phenols:<br>A-85 %<br>phosphoric acid<br>B-acetonitrile<br>C-methanol                        |                            |                                                                                                                                                                      |      |
| 36.                       | <i>H. capitatum</i> var.<br><i>capitatum</i> | naphthodianthrone<br>es     | hypericin<br>pseudohypericin<br>hyperforin,<br>adhyperforin                                              | Secondary metabolites<br>of <i>Hypericum</i> species<br>from the <i>Drosanthe</i> and<br><i>Olympia</i> sections | flavonoids, epicatechin, and<br>hyperforin:<br>RP, 150 X 4.6, 3<br>phenolic acids, catechin, and<br>mangiferin:<br>C18, 250×4.6, 5 | flavonoids,<br>epicatechin, and<br>hyperforin:<br>A-0.3 %<br>phosphoric acid<br>as eluent<br>B-0.3 %<br>phosphoric acid<br>in acetonitrile | 30<br>37<br>15             | UV-VIS<br>flavonoids,<br>epicatechin,<br>and<br>hyperforin:<br>270-360 nm<br>phenolic acids,<br>catechin, and<br>mangiferin:<br>275-360 nm<br>naphthodiantr<br>ones: | [5]  |
|                           | <i>H. capitatum</i> var.<br><i>luteum</i>    |                             | chlorogenic, neochl                                                                                      |                                                                                                                  |                                                                                                                                    |                                                                                                                                            |                            |                                                                                                                                                                      |      |
|                           | <i>H. elongatum</i> var.<br><i>elongatum</i> |                             | orogenic, caffeic<br>2,4-dihydroxybenz                                                                   |                                                                                                                  |                                                                                                                                    |                                                                                                                                            |                            |                                                                                                                                                                      |      |
|                           | <i>H. olympicum</i>                          |                             | oic acids                                                                                                |                                                                                                                  |                                                                                                                                    |                                                                                                                                            |                            |                                                                                                                                                                      |      |
|                           | <i>H. polyphyllum</i>                        | flavonoids and<br>flavonols |                                                                                                          |                                                                                                                  |                                                                                                                                    |                                                                                                                                            |                            |                                                                                                                                                                      |      |
|                           | <i>H. retusum</i>                            | phenolic acids              | hyperoside                                                                                               |                                                                                                                  |                                                                                                                                    |                                                                                                                                            |                            |                                                                                                                                                                      |      |
|                           | <i>H. salsolifolium</i>                      |                             | isoquercitrin                                                                                            |                                                                                                                  |                                                                                                                                    |                                                                                                                                            |                            |                                                                                                                                                                      |      |
|                           | <i>H. spectabile</i>                         |                             | quercitrin                                                                                               |                                                                                                                  |                                                                                                                                    |                                                                                                                                            |                            |                                                                                                                                                                      |      |
|                           | (aerial parts)                               |                             | quercetin<br>avicularin                                                                                  |                                                                                                                  |                                                                                                                                    |                                                                                                                                            |                            |                                                                                                                                                                      |      |
|                           |                                              |                             |                                                                                                          |                                                                                                                  |                                                                                                                                    | A-0.5 % acetic                                                                                                                             |                            |                                                                                                                                                                      |      |

| HPLC and UHPLC Techniques |                                        |                       |                                                                                               |                                                                                                             |                                                                                                 |                                                                                                                                                                                                                     |                            |                  |      |
|---------------------------|----------------------------------------|-----------------------|-----------------------------------------------------------------------------------------------|-------------------------------------------------------------------------------------------------------------|-------------------------------------------------------------------------------------------------|---------------------------------------------------------------------------------------------------------------------------------------------------------------------------------------------------------------------|----------------------------|------------------|------|
| No.                       | Plant<br>(plant parts)                 | Class of<br>Compounds | Compounds<br>Specific                                                                         | Application                                                                                                 | Chromatographic column<br>Chemistry, length X<br>diameter (mm X mm),<br>particle dimension (µm) | Mobile Phase                                                                                                                                                                                                        | Analysis<br>time<br>(min.) | Detection        | Ref. |
|                           |                                        |                       | rutin<br>(+)-catechin<br>(-)-epicatechin<br>mangiferin<br>I3, I18-biapigenin<br>amentoflavone |                                                                                                             |                                                                                                 | acid in water<br>B-100 %<br>methanol<br>naphthodiantron<br>es:<br>A-ethyl acetate,<br>B-aqueous 0.1 M<br>sodium<br>dihydrogen<br>phosphate<br>solution adjusted<br>to pH=2.0 using<br>phosphoric acid<br>C-methanol |                            | 560 nm           |      |
| 37.                       | <i>H. perforatum</i><br>(aerial parts) | flavonoids            | rutin<br>hyperoside<br>quercitrin<br>quercetin<br>biapigenin                                  | Variation in<br>concentrations of major<br>bioactive compounds in<br><i>H. perforatum</i> from<br>Lithuania | C18, 150 X 4, 7                                                                                 | A-acetonitrile:wa<br>ter:H3PO4<br>(19:80:1)<br>B-acetonitrile                                                                                                                                                       | 30                         | UV-VIS<br>254 nm | [10] |

**Table S2.** LC-MS and LC-MS/MS Techniques for the analysis of Hypericum Species.

| LC-MS and LC-MS/MS Techniques |                                                                                                                                                                        |                                      |                                                                                        |                                                                                                                                                                                                                                                            |                                                                                        |                                               |                      |                                     |      |
|-------------------------------|------------------------------------------------------------------------------------------------------------------------------------------------------------------------|--------------------------------------|----------------------------------------------------------------------------------------|------------------------------------------------------------------------------------------------------------------------------------------------------------------------------------------------------------------------------------------------------------|----------------------------------------------------------------------------------------|-----------------------------------------------|----------------------|-------------------------------------|------|
| No.                           | Plant                                                                                                                                                                  | Class of Compounds                   | Compounds Specific                                                                     | Application                                                                                                                                                                                                                                                | Chromatographic column Chemistry, length X diameter (mm X mm), particle dimension (µm) | Mobile Phase                                  | Analysis time (min.) | Detection                           | Ref. |
| 1.                            | <i>H. aciculare</i><br><i>H. andinum</i><br><i>H. brevistylum</i><br><i>H. decandrum</i><br><i>H. laricifolium</i><br><i>H. silenoides</i><br>(flowering aerial parts) | acylphloroglucinol derivatives       | uliginosin A<br>isouliginosin B<br>isohyperbrasilol<br>uliginosin B<br>hyperbrasilol B | Assay the antichemotactic activity, in the in vitro lipopoly- saccharide-induced chemotaxis on rat polymorphonuclear neutrophils (PMNs) cells, of lipophilic extracts of six Peruvian <i>Hypericum</i> , qualitatively characterize the acylphloroglucinol | C18, 150 X 3.9, 4                                                                      | A-water<br>B-Acetonitrile and Methanol 8:2    | 25                   | ESI +<br>ESI -<br>single quadrupole | [59] |
| 2.                            | <i>H. perforatum</i>                                                                                                                                                   | acylphloroglucinol derivatives       | hyperforin<br>adsecohyperforin<br>secohyperforin<br>adhyperforin                       | Hyperforin production in <i>H. perforatum</i> root cultures                                                                                                                                                                                                | Direct infusion                                                                        | -                                             | -                    | ESI -<br>QTrap                      | [62] |
| 3.                            | <i>H. perforatum</i><br><i>H. maculatum</i><br><i>H. hirsutum</i><br><i>H. tetrapterum</i><br>(stem leaves flowers)                                                    | polyphenolic compounds and hypericin | hypericin                                                                              | Screening of bioactives compounds and antioxidant capacity of different <i>Hypericum</i> species                                                                                                                                                           |                                                                                        | A-Acetic acid 0.1 %<br>in water<br>B-methanol | 35                   | -                                   | [46] |

| LC-MS and LC-MS/MS Techniques |                                                                                 |                                                                |                                                                                                                                                          |                                                                                                                                       |                                                                                        |                                                                                                 |                      |                |      |
|-------------------------------|---------------------------------------------------------------------------------|----------------------------------------------------------------|----------------------------------------------------------------------------------------------------------------------------------------------------------|---------------------------------------------------------------------------------------------------------------------------------------|----------------------------------------------------------------------------------------|-------------------------------------------------------------------------------------------------|----------------------|----------------|------|
| No.                           | Plant                                                                           | Class of Compounds                                             | Compounds Specific                                                                                                                                       | Application                                                                                                                           | Chromatographic column Chemistry, length X diameter (mm X mm), particle dimension (µm) | Mobile Phase                                                                                    | Analysis time (min.) | Detection      | Ref. |
| 4.                            | <i>H. perforatum</i> (in vitro shoot cultures)                                  | naphthodianthrones, bisanthrones precursors skyrin derivatives | hypericin, pseudohypericin, protohypericin and protopseudohypericin emodin and skyrin                                                                    | Simultaneous determination of naphthodianthrones, emodin, skyrin and new bisanthrones in <i>H. perforatum</i> in vitro shoot cultures | C18, 100 X 2.1, 1.7                                                                    | A-10 mM of ammonium acetate acidified with 0.1 % formic acid<br>B-acetonitrile/methanol (80:20) | 13                   | ESI - Orbitrap | [32] |
| 5.                            | <i>H. scruglii</i><br><i>H. hircinum</i><br><i>H. perforatum</i> (aerial parts) | phloroglucinol derivatives                                     | oxyskyrin, iridoskyrin, rubroskyrin and luteoskyrin<br>3-geranyl-1-(2'-methylbutanoyl)-phloroglucinol<br>3-geranyl-1-(2'-methylpropanoyl)-phloroglucinol | Phytochemical profile and α-glucosidase inhibitory activity of Sardinian <i>H. scruglii</i> and <i>H. hircinum</i>                    | RP, 250 X 4,6, 4                                                                       | A-0.1 % formic acid in water<br>B-0.1 % acetonitrile                                            | -                    | ESI - QQQ      | [51] |
| 6.                            | <i>H. perforatum</i>                                                            | phenolic acids                                                 | chlorogenic acid                                                                                                                                         | The effects of abiotic stressors                                                                                                      | C18, 100 X 4.6, 5                                                                      | A-0.5 %                                                                                         | 30                   | ESI –          | [80] |

| LC-MS and LC-MS/MS Techniques |                                          |                                  |                                                    |                                                                                                                                                                                                                        |                                                                                        |                                                                                                                                                                     |                      |              |         |
|-------------------------------|------------------------------------------|----------------------------------|----------------------------------------------------|------------------------------------------------------------------------------------------------------------------------------------------------------------------------------------------------------------------------|----------------------------------------------------------------------------------------|---------------------------------------------------------------------------------------------------------------------------------------------------------------------|----------------------|--------------|---------|
| No.                           | Plant                                    | Class of Compounds               | Compounds Specific                                 | Application                                                                                                                                                                                                            | Chromatographic column Chemistry, length X diameter (mm X mm), particle dimension (µm) | Mobile Phase                                                                                                                                                        | Analysis time (min.) | Detection    | Ref.    |
|                               | (aerial parts)                           | flavonoids<br>naphthodianthrones | quercetin<br>rutin<br>pseudohypericin<br>hypericin | and signal molecules on phenolic composition and antioxidant activities of in vitro regenerated <i>H. perforatum</i>                                                                                                   | C18, 150 X 2.1, 5                                                                      | trifluoroacetic acid<br>in water<br>B-0.5 %<br>trifluoroacetic acid<br>in acetonitrile<br>A-0.5 % formic acid<br>in water<br>B-0.5 % formic acid<br>in acetonitrile | 21                   | ESI +<br>QQQ |         |
| 7.                            | <i>H. perforatum</i><br>(shoot cultures) | naphthodianthrones               | hypericin and pseudohypericin                      | Biological studies confirmed that nano-perlite and MnO <sub>2</sub> /perlite-NCs effect to <i>H. perforatum</i> showing positive effects<br><br>Determination of hypericin and pseudohypericin using LC-MS/MS analysis | RP, 40 X 2, 5                                                                          | A-0.01 M, pH=7<br>triethylammonium acetate buffer<br>B-methanol and acetonitrile (1:1)                                                                              | 10.5                 | ESI -        | [55]    |
| 8.                            | <i>H. perforatum</i>                     | phenolic acids                   | hyperforin                                         | Method of establishing the                                                                                                                                                                                             | phenolic acids,                                                                        | phenolic acids and                                                                                                                                                  | 30                   | phenolic     | [20,89] |

| LC-MS and LC-MS/MS Techniques |             |                                                                                                          |                                                                                                                                                                                                                                                                                              |                                                  |                                                                                                                           |                                                                                                                                                                            |                      |                                                                                                                                                                      |      |
|-------------------------------|-------------|----------------------------------------------------------------------------------------------------------|----------------------------------------------------------------------------------------------------------------------------------------------------------------------------------------------------------------------------------------------------------------------------------------------|--------------------------------------------------|---------------------------------------------------------------------------------------------------------------------------|----------------------------------------------------------------------------------------------------------------------------------------------------------------------------|----------------------|----------------------------------------------------------------------------------------------------------------------------------------------------------------------|------|
| No.                           | Plant       | Class of Compounds                                                                                       | Compounds Specific                                                                                                                                                                                                                                                                           | Application                                      | Chromatographic column Chemistry, length X diameter (mm X mm), particle dimension (µm)                                    | Mobile Phase                                                                                                                                                               | Analysis time (min.) | Detection                                                                                                                                                            | Ref. |
|                               | (raw plant) | flavonoid<br>diterpenes<br>polyprenylated<br>acylphloroglucinol<br>derivative<br>naphthodianthrone<br>es | hypericin<br>method 1<br>protocatechuic<br>acid<br>neochlorogenic<br>acid<br>chlorogenic acid<br>(-)-epicatechin<br>rutin<br>hyperoside<br>-soquercitrin<br>quercitrin<br>quercetin<br>I3, II8-biapigenin<br><br>method 2<br>furohyperforin<br>hyperforin<br>adhyperforin<br>pseudohypericin | authenticity and quality of <i>H. perforatum</i> | flavonoids and<br>diterpenes:<br>C18, 250 X 2, 5<br><br>hyperforin and<br>hypericin derivatives<br>C18. 50 X 2 monolithic | flavonoids<br>A- Acetonitrile<br>B-0.1 % formic acids<br>in water<br><br>naphthodianthrone<br>and phloroglucinols<br><br>A-acetonitrile<br>B-0.1 % formic acid<br>in water | 25                   | acids and<br>flavonoids<br>ESI- Scan<br>mode<br>m/z<br>120-650<br><br>naphthodi<br>anthrones<br>and<br>phloroglu<br>cinols<br>ESI +/-<br>Scan mode<br>m/z<br>120-650 |      |



| LC-MS and LC-MS/MS Techniques |                                |                    |                                                                                                                                                                                                                                                                                            |                         |                                                                                        |                |                      |                             |      |
|-------------------------------|--------------------------------|--------------------|--------------------------------------------------------------------------------------------------------------------------------------------------------------------------------------------------------------------------------------------------------------------------------------------|-------------------------|----------------------------------------------------------------------------------------|----------------|----------------------|-----------------------------|------|
| No.                           | Plant                          | Class of Compounds | Compounds Specific                                                                                                                                                                                                                                                                         | Application             | Chromatographic column Chemistry, length X diameter (mm X mm), particle dimension (µm) | Mobile Phase   | Analysis time (min.) | Detection                   | Ref. |
|                               | (air dried leaves and flowers) | naphthodianthrone  | caffeic acid glucoside<br>vanillic acid glucoside<br>neochlorogenic acid<br>chlorogenic acid<br>catechin<br>epicatechin<br>myricetin<br>glucoside,<br>hyperoside<br>isoquercitrin<br>rutin<br>quercetin<br>pentoside,<br>quercitrin<br>kaempferol<br>glucoside<br>kaempferol<br>rutinoside | and <i>H. maculatum</i> |                                                                                        | B-acetonitrile |                      | Scan mode<br>m/z<br>50-1000 |      |

| LC-MS and LC-MS/MS Techniques |                                                                          |                                                                                                                                                                       |                                                                                                                                                                                                             |                                                                                              |                                                                                        |                                             |                      |                                         |      |
|-------------------------------|--------------------------------------------------------------------------|-----------------------------------------------------------------------------------------------------------------------------------------------------------------------|-------------------------------------------------------------------------------------------------------------------------------------------------------------------------------------------------------------|----------------------------------------------------------------------------------------------|----------------------------------------------------------------------------------------|---------------------------------------------|----------------------|-----------------------------------------|------|
| No.                           | Plant                                                                    | Class of Compounds                                                                                                                                                    | Compounds Specific                                                                                                                                                                                          | Application                                                                                  | Chromatographic column Chemistry, length X diameter (mm X mm), particle dimension (µm) | Mobile Phase                                | Analysis time (min.) | Detection                               | Ref. |
|                               |                                                                          |                                                                                                                                                                       | quercetin<br>hyperforin<br>adhyperforin,<br>protopseudohyper<br>icin<br>pseudohypericin<br>hypericin                                                                                                        |                                                                                              |                                                                                        |                                             |                      |                                         |      |
| 12.                           | <i>H. perforatum</i><br>roots,<br>non-flower<br>shoots, flower<br>shoots | phenolic acids<br>flavan-3-ols<br>flavonol<br>glycosides<br>flavonoid<br>aglycones<br>anthocyanins<br>naphthodianthron<br>es<br>acyl-phloroglucin<br>ols<br>xanthones | phenolic acids<br>quinic acid<br>chlorogenic acid<br>3-p-coumaroylqui<br>nic acid<br>3-feruloylquinic<br>acid<br>flavan-3-ols<br>catechin<br>B-type<br>procyanidin dimer<br>procyanidin<br>trimer<br>B-type | Phytochemical composition of<br><i>H. perforatum</i> from Northern<br>Republic of Macedonia. | C18, 150 × 4.6, 5 µm                                                                   | A-water–formic acid<br>(99:1)<br>B-methanol | 90                   | ESI +<br>ESI -<br>ion trap<br>Full scan | [18] |

| LC-MS and LC-MS/MS Techniques |       |                    |                                                                                                                                                                                                                                                   |             |                                                                                        |              |                      |           |      |
|-------------------------------|-------|--------------------|---------------------------------------------------------------------------------------------------------------------------------------------------------------------------------------------------------------------------------------------------|-------------|----------------------------------------------------------------------------------------|--------------|----------------------|-----------|------|
| No.                           | Plant | Class of Compounds | Compounds Specific                                                                                                                                                                                                                                | Application | Chromatographic column Chemistry, length X diameter (mm X mm), particle dimension (µm) | Mobile Phase | Analysis time (min.) | Detection | Ref. |
|                               |       |                    | procyanidin dimer<br>(Epi)catechin<br>B-type<br>procyanidin dimer                                                                                                                                                                                 |             |                                                                                        |              |                      |           |      |
|                               |       |                    | flavonol<br>glycosides<br>quercetin<br>3-O-galactoside)<br>quercetin<br>3-O-rutinoside<br>guaijaverin<br>quercetin<br>3-O-arabinoside<br>kaempferol<br>3-O-glucoside<br>quercetin<br>3-O-rhamnoside)<br>kaempferol<br>3-O-rutinoside<br>flavonoid |             |                                                                                        |              |                      |           |      |

| LC-MS and LC-MS/MS Techniques |       |                    |                    |             |                                                                                        |              |                      |           |      |
|-------------------------------|-------|--------------------|--------------------|-------------|----------------------------------------------------------------------------------------|--------------|----------------------|-----------|------|
| No.                           | Plant | Class of Compounds | Compounds Specific | Application | Chromatographic column Chemistry, length X diameter (mm X mm), particle dimension (µm) | Mobile Phase | Analysis time (min.) | Detection | Ref. |
|                               |       |                    | aglycones          |             |                                                                                        |              |                      |           |      |
|                               |       |                    | quercetin          |             |                                                                                        |              |                      |           |      |
|                               |       |                    | I3–II8 Biapigenin  |             |                                                                                        |              |                      |           |      |
|                               |       |                    | amentoflavone      |             |                                                                                        |              |                      |           |      |
|                               |       |                    | anthocyanins       |             |                                                                                        |              |                      |           |      |
|                               |       |                    | cyanidin           |             |                                                                                        |              |                      |           |      |
|                               |       |                    | 3-O-glycoside      |             |                                                                                        |              |                      |           |      |
|                               |       |                    | cyanidin           |             |                                                                                        |              |                      |           |      |
|                               |       |                    | 3-O-rhamnoside     |             |                                                                                        |              |                      |           |      |
|                               |       |                    | naphthodianthron   |             |                                                                                        |              |                      |           |      |
|                               |       |                    | es                 |             |                                                                                        |              |                      |           |      |
|                               |       |                    | pseudohypericin    |             |                                                                                        |              |                      |           |      |
|                               |       |                    | padiaxanthone      |             |                                                                                        |              |                      |           |      |
|                               |       |                    | brasilixanthone    |             |                                                                                        |              |                      |           |      |
|                               |       |                    | dimethylmangiferi  |             |                                                                                        |              |                      |           |      |
|                               |       |                    | n                  |             |                                                                                        |              |                      |           |      |
|                               |       |                    | xanthone           |             |                                                                                        |              |                      |           |      |
|                               |       |                    | derivative         |             |                                                                                        |              |                      |           |      |
|                               |       |                    | 3,6-dihydroxy-1,5, |             |                                                                                        |              |                      |           |      |

| LC-MS and LC-MS/MS Techniques |                                     |                                                    |                                                                                                                                                                     |                                                                                        |                                                                                        |                                   |                      |                               |      |
|-------------------------------|-------------------------------------|----------------------------------------------------|---------------------------------------------------------------------------------------------------------------------------------------------------------------------|----------------------------------------------------------------------------------------|----------------------------------------------------------------------------------------|-----------------------------------|----------------------|-------------------------------|------|
| No.                           | Plant                               | Class of Compounds                                 | Compounds Specific                                                                                                                                                  | Application                                                                            | Chromatographic column Chemistry, length X diameter (mm X mm), particle dimension (µm) | Mobile Phase                      | Analysis time (min.) | Detection                     | Ref. |
| 13.                           | <i>H. perforatum</i> (aerial parts) | phenolic acids<br>flavonoids<br>naphthodianthrones | 7-trimethoxy-xanthone<br>cadensin C<br>mangostin<br>5-O-Methyl-2-deprenylrheediaxanthone B<br>cadensin G<br>garcinone C<br>cadensin C isomer                        | Optimisation of polyphenol extraction from <i>H. perforatum</i> using aqueous glycerol | C18, 150 X 2, 4                                                                        | A-2.5 % acetic acid<br>B-methanol | 60                   | ESI +<br>Single<br>quadrupole | [57] |
|                               |                                     |                                                    | caffeoylquinic acid<br>p-coumaroylquinic acid<br>chlorogenic acid<br>derivative<br>catechin<br>quercetin<br>3-O-galactoside<br>quercetin<br>rutinoside<br>quercetin |                                                                                        |                                                                                        |                                   |                      |                               |      |

| LC-MS and LC-MS/MS Techniques |                                                                                                                                                                                             |                                                                                     |                                 |                                                                                                    |                                                                                        |                                                                   |                      |                                            |      |
|-------------------------------|---------------------------------------------------------------------------------------------------------------------------------------------------------------------------------------------|-------------------------------------------------------------------------------------|---------------------------------|----------------------------------------------------------------------------------------------------|----------------------------------------------------------------------------------------|-------------------------------------------------------------------|----------------------|--------------------------------------------|------|
| No.                           | Plant                                                                                                                                                                                       | Class of Compounds                                                                  | Compounds Specific              | Application                                                                                        | Chromatographic column Chemistry, length X diameter (mm X mm), particle dimension (µm) | Mobile Phase                                                      | Analysis time (min.) | Detection                                  | Ref. |
| 14.                           | <i>H. cardonae</i><br><i>H. myricariifolium</i><br><i>H. laricifolium</i><br><i>H. humboldtianum</i><br><i>H. garciae</i><br><i>H. carinosum</i><br><i>H. cuatrecasii</i><br>(aerial parts) | Flavonols<br>Flavan-3-ols<br>Stilbenoids<br>Coumarins<br>Cinnamic Acids<br>Flavones | rhamnoside derivative hypericin | Phenolic profile, chemical relationship and antifungal activity of Andean <i>Hypericum</i> species | HSS T3, 150 × 2.1, 1.8                                                                 | A-0.1% formic acid in water<br>B-0.1% formic acid in acetonitrile | 15                   | ESI +<br>ESI –<br>Triple quadrupole<br>MRM | [40] |
|                               |                                                                                                                                                                                             |                                                                                     | caffeic acid                    |                                                                                                    |                                                                                        |                                                                   |                      |                                            |      |
|                               |                                                                                                                                                                                             |                                                                                     | 3,5-dihydroxybenzoic acid       |                                                                                                    |                                                                                        |                                                                   |                      |                                            |      |
|                               |                                                                                                                                                                                             |                                                                                     | gallic acid                     |                                                                                                    |                                                                                        |                                                                   |                      |                                            |      |
|                               |                                                                                                                                                                                             |                                                                                     | vanillic acid                   |                                                                                                    |                                                                                        |                                                                   |                      |                                            |      |
|                               |                                                                                                                                                                                             |                                                                                     | 2,6-di-OH-benzoic acid          |                                                                                                    |                                                                                        |                                                                   |                      |                                            |      |
|                               |                                                                                                                                                                                             |                                                                                     | p-OH-benzoic acid               |                                                                                                    |                                                                                        |                                                                   |                      |                                            |      |
|                               |                                                                                                                                                                                             |                                                                                     | cinnamic acid                   |                                                                                                    |                                                                                        |                                                                   |                      |                                            |      |
|                               |                                                                                                                                                                                             |                                                                                     | kampferol                       |                                                                                                    |                                                                                        |                                                                   |                      |                                            |      |
|                               |                                                                                                                                                                                             |                                                                                     | quercetin-3-glucuronide         |                                                                                                    |                                                                                        |                                                                   |                      |                                            |      |
|                               |                                                                                                                                                                                             |                                                                                     | quercetin-3-rubusoside          |                                                                                                    |                                                                                        |                                                                   |                      |                                            |      |
|                               |                                                                                                                                                                                             |                                                                                     | quercetin                       |                                                                                                    |                                                                                        |                                                                   |                      |                                            |      |
|                               |                                                                                                                                                                                             |                                                                                     | quercetin-3-glucoside           |                                                                                                    |                                                                                        |                                                                   |                      |                                            |      |
|                               |                                                                                                                                                                                             |                                                                                     | kampferol-3-glucuronide         |                                                                                                    |                                                                                        |                                                                   |                      |                                            |      |

| LC-MS and LC-MS/MS Techniques |       |                    |                            |             |                                                                                        |              |                      |           |      |
|-------------------------------|-------|--------------------|----------------------------|-------------|----------------------------------------------------------------------------------------|--------------|----------------------|-----------|------|
| No.                           | Plant | Class of Compounds | Compounds Specific         | Application | Chromatographic column Chemistry, length X diameter (mm X mm), particle dimension (µm) | Mobile Phase | Analysis time (min.) | Detection | Ref. |
|                               |       |                    | ronide                     |             |                                                                                        |              |                      |           |      |
|                               |       |                    | kampferol                  |             |                                                                                        |              |                      |           |      |
|                               |       |                    | -3-glucoside               |             |                                                                                        |              |                      |           |      |
|                               |       |                    | iso-rhamnetin              |             |                                                                                        |              |                      |           |      |
|                               |       |                    | syringetin-3-glucoside     |             |                                                                                        |              |                      |           |      |
|                               |       |                    | iso-rhamnetine-3-glucoside |             |                                                                                        |              |                      |           |      |
|                               |       |                    | myricetin                  |             |                                                                                        |              |                      |           |      |
|                               |       |                    | catechin                   |             |                                                                                        |              |                      |           |      |
|                               |       |                    | epicatechin                |             |                                                                                        |              |                      |           |      |
|                               |       |                    | gallocatechin              |             |                                                                                        |              |                      |           |      |
|                               |       |                    | epigallocatechin           |             |                                                                                        |              |                      |           |      |
|                               |       |                    | procyanidin B1             |             |                                                                                        |              |                      |           |      |
|                               |       |                    | procyanidin B2             |             |                                                                                        |              |                      |           |      |
|                               |       |                    | c-piceid                   |             |                                                                                        |              |                      |           |      |
|                               |       |                    | wsculin                    |             |                                                                                        |              |                      |           |      |
|                               |       |                    | neochlorogenic acid        |             |                                                                                        |              |                      |           |      |
|                               |       |                    | cryptochlorogenic acid     |             |                                                                                        |              |                      |           |      |

| LC-MS and LC-MS/MS Techniques |                                                                                                |                    |                                                                                                                                                                                                         |                                                                                                                                  |                                                                                        |                                                                         |                      |                                                                    |      |
|-------------------------------|------------------------------------------------------------------------------------------------|--------------------|---------------------------------------------------------------------------------------------------------------------------------------------------------------------------------------------------------|----------------------------------------------------------------------------------------------------------------------------------|----------------------------------------------------------------------------------------|-------------------------------------------------------------------------|----------------------|--------------------------------------------------------------------|------|
| No.                           | Plant                                                                                          | Class of Compounds | Compounds Specific                                                                                                                                                                                      | Application                                                                                                                      | Chromatographic column Chemistry, length X diameter (mm X mm), particle dimension (μm) | Mobile Phase                                                            | Analysis time (min.) | Detection                                                          | Ref. |
|                               |                                                                                                |                    | chlorogenic acid<br>coniferyl alchol<br>phlorizin<br>luteolin<br>naringenin<br>luteolin<br>7-O-glucosid<br>naringenin-7-glucoside                                                                       |                                                                                                                                  |                                                                                        |                                                                         |                      |                                                                    |      |
| 15.                           | <i>H. perforatum</i><br><i>H. calycinum</i><br><i>H. confertum</i><br>(flowering aerial parts) | multiple classes   | coumarin<br>hesperidin<br>p-coumaric acid<br>o-coumaric acid<br>gallic Acid<br>6-caffeic Acid<br>vanilic Acid<br>salicylic Acid<br>quinic Acid<br>4-OH-benzoic acid<br>ferulic acid<br>chlorogenic acid | Anti-aging potential and anti-tyrosinase activity of three Hypericum species with focus on phytochemical composition by LC–MS/MS | C18, 100 × 2.1, 2                                                                      | A-10mM ammonium formate and 0.1% formic acid in water<br>B-acetonitrile | 50                   | ESI +<br>ESI –<br>Triple quadrupole MRM<br>2 transitions /compound | [14] |

| LC-MS and LC-MS/MS Techniques |       |                    |                                                                                                                                                                                                                                                                                                         |             |                                                                                        |              |                      |           |      |
|-------------------------------|-------|--------------------|---------------------------------------------------------------------------------------------------------------------------------------------------------------------------------------------------------------------------------------------------------------------------------------------------------|-------------|----------------------------------------------------------------------------------------|--------------|----------------------|-----------|------|
| No.                           | Plant | Class of Compounds | Compounds Specific                                                                                                                                                                                                                                                                                      | Application | Chromatographic column Chemistry, length X diameter (mm X mm), particle dimension (µm) | Mobile Phase | Analysis time (min.) | Detection | Ref. |
|                               |       |                    | rosmarinic acid<br>protocatechuic acid<br>cinnamic Acid<br>sinapinic Acid<br>fumaric Acid<br>vanilin<br>pyrocatechol<br>malic acid<br>syringic acid<br>hesperetin<br>naringenin<br>rutin<br>quercetin<br>quercitrin<br>apigenin<br>chrysin<br>liquiritigenin<br>isoquercitrin<br>apigetrin<br>rhoifolin |             |                                                                                        |              |                      |           |      |

| LC-MS and LC-MS/MS Techniques |                                                                                                           |                                                                                 |                                                                                                   |                                                                                                                       |                                                                                           |                                                    |                                  |                                            |      |
|-------------------------------|-----------------------------------------------------------------------------------------------------------|---------------------------------------------------------------------------------|---------------------------------------------------------------------------------------------------|-----------------------------------------------------------------------------------------------------------------------|-------------------------------------------------------------------------------------------|----------------------------------------------------|----------------------------------|--------------------------------------------|------|
| No.                           | Plant                                                                                                     | Class of Compounds                                                              | Compounds Specific                                                                                | Application                                                                                                           | Chromatographic column<br>Chemistry, length X diameter (mm X mm), particle dimension (µm) | Mobile Phase                                       | Analysis time (min.)             | Detection                                  | Ref. |
|                               |                                                                                                           |                                                                                 | nicotiflorin<br>fisetin<br>luteolin<br>myricetin<br>kaempferol                                    |                                                                                                                       |                                                                                           |                                                    |                                  |                                            |      |
| 16.                           | <i>H. perforatum</i><br>(aerial parts)                                                                    | flavonols<br>flavonoids<br>phenolic acids                                       | (+)-catechin<br>(-)-epicatechin<br>chlorogenic acid<br>hyperoside<br>I3, I18-biapigenin<br>rutin. | Improvement of antioxidant activity and polyphenol content of <i>H. perforatum</i>                                    | C18, 150, 4.6, 3                                                                          | A-0.5% formic acid<br>in water<br>B-acetonitrile.  | 35                               | ESI –<br>Scan mode<br>Single<br>quadrupole | [38] |
| 17.                           | <i>H. reflexum</i> ,<br><i>H. canariense</i><br><i>H. grandifolium</i><br>(top flowering<br>aerial parts) | naphthodianthrone                                                               | hypericin                                                                                         | Phytochemical analysis and in vitro biological activity of three <i>Hypericum</i> species from the Canary Islands     | C18, 250 X 4.6, 5                                                                         | A-water<br>B-acetonitrile/methanol (90:10 v/v)     | 15<br>C18 (250 ×<br>4.6 mm, 5 µ) | ESI -<br>Ion Trap<br>SIM/TIC/E<br>IC       | [19] |
| 18.                           | <i>H. perforatum</i><br>(whole plant)                                                                     | phenolic acids<br>flavonols<br>epicatechin<br>procyanidins<br>naphthodianthrone | phenolic acids:<br>gallic acid<br>protocatechuic<br>acid<br>protocatechuic                        | Oxidative stress induced by lanthanum and cadmium produces modifications in metabolic profile of <i>H. perforatum</i> | C18, 50 X 3, 2.7                                                                          | A-methanol<br>B-0.2% (v/v) acetic<br>acid in water | 8                                | ESI – for<br>procyanidins<br>MRM           | [96] |

| LC-MS and LC-MS/MS Techniques |       |                    |                                                                                                                                                                                                                                                                                                |             |                                                                                        |              |                      |           |      |
|-------------------------------|-------|--------------------|------------------------------------------------------------------------------------------------------------------------------------------------------------------------------------------------------------------------------------------------------------------------------------------------|-------------|----------------------------------------------------------------------------------------|--------------|----------------------|-----------|------|
| No.                           | Plant | Class of Compounds | Compounds Specific                                                                                                                                                                                                                                                                             | Application | Chromatographic column Chemistry, length X diameter (mm X mm), particle dimension (µm) | Mobile Phase | Analysis time (min.) | Detection | Ref. |
|                               |       | s                  | aldehyde<br>p-OH-benzoic acid<br>p-OH-benzoic aldehyde<br>vanillic acid<br>vanillin<br>syringic acid<br>salicylic acid<br>chlorogenic acid<br>caffeic acid<br>ferulic acid<br>p-coumaric acid<br><br>flavonols:<br>astragalin<br>hyperoside<br>quercetin<br>quercitrin<br>rutin<br>epicatechin |             |                                                                                        |              |                      |           |      |

| LC-MS and LC-MS/MS Techniques |                                                                                                                                                                                |                                                                                                                                                                                          |                                                                   |                                                                                                            |                                                                                        |                                                  |                      |                                                       |      |
|-------------------------------|--------------------------------------------------------------------------------------------------------------------------------------------------------------------------------|------------------------------------------------------------------------------------------------------------------------------------------------------------------------------------------|-------------------------------------------------------------------|------------------------------------------------------------------------------------------------------------|----------------------------------------------------------------------------------------|--------------------------------------------------|----------------------|-------------------------------------------------------|------|
| No.                           | Plant                                                                                                                                                                          | Class of Compounds                                                                                                                                                                       | Compounds Specific                                                | Application                                                                                                | Chromatographic column Chemistry, length X diameter (mm X mm), particle dimension (µm) | Mobile Phase                                     | Analysis time (min.) | Detection                                             | Ref. |
|                               |                                                                                                                                                                                |                                                                                                                                                                                          | naphthodianthrone<br>s:<br>hypericin<br>hyperforin                |                                                                                                            |                                                                                        |                                                  |                      |                                                       |      |
| 19.                           | <i>H. perforatum</i><br><i>ssp. veronense</i><br><i>H. perfoliatum</i><br><i>H. empetrifolium</i><br><i>ssp. empetrifolium</i><br><i>H. tri-quetrifolium</i><br>(aerial parts) | multiple<br>caffeoylquinic<br>acids<br>flavonoids<br>flavonoid<br>glycosides<br>biflavones<br>xanthones<br>naphthodianthrone<br>s<br>phloroglucinols or<br>phloroglucinol<br>derivatives | 63 compounds                                                      | Metabolomic fingerprinting<br>and genetic discrimination of<br>four <i>Hypericum</i> taxa from<br>Greece   | C18, 100 × 2.1, 1.7                                                                    | A-0.1 % aqueous<br>formic acid<br>B-acetonitrile | 25 minutes           | ESI –<br>ESI +<br>Full scan<br>m/z<br>85-1200<br>QTOF | [48] |
| 20.                           | <i>H. perforatum</i><br><i>H. rumeliacum</i><br><i>H. triquetrifolium</i><br>(extracts)                                                                                        | phenolic acids<br>flavonols<br>biflavones,<br>naphthodianthrone                                                                                                                          | naphthodianthrone<br>s:<br>protohypericin<br>protopseudohypericin | Compound identification and<br>correlation with necrotic<br>cell-death activity in human<br>leukemic cells | RP, 100 × 2.1, 3                                                                       | A-0.1 % acetic acid<br>in water<br>B- methanol   | 24 minutes           | ESI -<br>Orbitrap                                     | [68] |

| LC-MS and LC-MS/MS Techniques |       |                    |                              |             |                                                                                        |              |                      |           |      |
|-------------------------------|-------|--------------------|------------------------------|-------------|----------------------------------------------------------------------------------------|--------------|----------------------|-----------|------|
| No.                           | Plant | Class of Compounds | Compounds Specific           | Application | Chromatographic column Chemistry, length X diameter (mm X mm), particle dimension (µm) | Mobile Phase | Analysis time (min.) | Detection | Ref. |
|                               |       | es                 | icin                         |             |                                                                                        |              |                      |           |      |
|                               |       | phloroglucinols,   | hypericin<br>pseudohypericin |             |                                                                                        |              |                      |           |      |
|                               |       |                    | phloroglucinols:             |             |                                                                                        |              |                      |           |      |
|                               |       |                    | hyperforin                   |             |                                                                                        |              |                      |           |      |
|                               |       |                    | hyperforin                   |             |                                                                                        |              |                      |           |      |
|                               |       |                    | hyperjovinol B               |             |                                                                                        |              |                      |           |      |
|                               |       |                    | flavonoids:                  |             |                                                                                        |              |                      |           |      |
|                               |       |                    | flavonoid-O-glyco            |             |                                                                                        |              |                      |           |      |
|                               |       |                    | sides                        |             |                                                                                        |              |                      |           |      |
|                               |       |                    | quercetin                    |             |                                                                                        |              |                      |           |      |
|                               |       |                    | 3-O-pentoside                |             |                                                                                        |              |                      |           |      |
|                               |       |                    | skyrin-2-O-glucop            |             |                                                                                        |              |                      |           |      |
|                               |       |                    | yranoside                    |             |                                                                                        |              |                      |           |      |
|                               |       |                    | rutin                        |             |                                                                                        |              |                      |           |      |
|                               |       |                    | miquelianin                  |             |                                                                                        |              |                      |           |      |
|                               |       |                    | hyperoside                   |             |                                                                                        |              |                      |           |      |
|                               |       |                    | isoquercitrin                |             |                                                                                        |              |                      |           |      |
|                               |       |                    | astilbin                     |             |                                                                                        |              |                      |           |      |

| LC-MS and LC-MS/MS Techniques |                      |                         |                                                                                                                                |                                                                                |                                                                                        |                                              |                      |                              |      |
|-------------------------------|----------------------|-------------------------|--------------------------------------------------------------------------------------------------------------------------------|--------------------------------------------------------------------------------|----------------------------------------------------------------------------------------|----------------------------------------------|----------------------|------------------------------|------|
| No.                           | Plant                | Class of Compounds      | Compounds Specific                                                                                                             | Application                                                                    | Chromatographic column Chemistry, length X diameter (mm X mm), particle dimension (µm) | Mobile Phase                                 | Analysis time (min.) | Detection                    | Ref. |
|                               |                      |                         | quercitrin<br>aglycon quercetin                                                                                                |                                                                                |                                                                                        |                                              |                      |                              |      |
|                               |                      |                         | biflavones:<br>biapigenin<br>amentoflavone                                                                                     |                                                                                |                                                                                        |                                              |                      |                              |      |
|                               |                      |                         | chlorogenic acids:<br>caffeic, ferulic and<br>p-coumaric acid<br>quinic acid<br>chlorogenic acid<br>3-O-feruloylquinic<br>acid |                                                                                |                                                                                        |                                              |                      |                              |      |
| 21.                           | <i>H. perforatum</i> | flavonols<br>flavonoids | rutin<br>hyperoside,<br>quercitrin<br>and quercetin<br>adducts with<br>ABTS+                                                   | ABTS+ scavenging potency of<br>selected flavonols from<br><i>H. perforatum</i> | C18, 100 X 4.6, 5                                                                      | A-0.1% formic acid<br>in water<br>B-methanol | 21.0 min             | ESI +<br>ESI –<br>QQQ<br>MRM | [95] |
| 22.                           | <i>H. aegypticum</i> | naphthodianthron        | naphtodianthrone                                                                                                               | Phytochemical profiles,                                                        | C18, 250 X 4.6, 5 µm                                                                   | polyphenols:                                 | 50                   | ESI +                        | [30] |

| LC-MS and LC-MS/MS Techniques |                       |                    |                    |                                       |                                                                                        |                      |                      |           |      |
|-------------------------------|-----------------------|--------------------|--------------------|---------------------------------------|----------------------------------------------------------------------------------------|----------------------|----------------------|-----------|------|
| No.                           | Plant                 | Class of Compounds | Compounds Specific | Application                           | Chromatographic column Chemistry, length X diameter (mm X mm), particle dimension (µm) | Mobile Phase         | Analysis time (min.) | Detection | Ref. |
|                               | <i>H. androsaemum</i> | es                 | s:                 | phototoxic and antioxidant            |                                                                                        | A-                   |                      | orbitrap  |      |
|                               | <i>H. calycinum</i>   | acylphloroglucinol |                    | properties of eleven <i>Hypericum</i> |                                                                                        | B- 2.5% formic       |                      | Full scan |      |
|                               | <i>H. hircinum</i>    | s                  | protopseudohyper   | species – a comparative study         |                                                                                        | acid in acetonitrile |                      | m/z       |      |
|                               | <i>H. hirsutum</i>    | cinnamic acids     | icin               |                                       |                                                                                        |                      |                      | 120-1500  |      |
|                               | <i>H. montanum</i>    | flavonoids         | pseudohypericin    |                                       |                                                                                        | naphthodiantrones    |                      |           |      |
|                               | <i>H. patulum</i>     | biflavones         | protohypericin     |                                       |                                                                                        | and phloroglucinols: |                      |           |      |
|                               | <i>H. perforiatum</i> |                    | hypericin          |                                       |                                                                                        | B-acetonitrile       |                      |           |      |
|                               | <i>H. perforatum</i>  |                    |                    |                                       |                                                                                        | A-20 mM              |                      |           |      |
|                               | <i>H. pubescens</i>   |                    | acylphloroglucinol |                                       |                                                                                        | ammonium acetate     |                      |           |      |
|                               | <i>H. tetrapterum</i> |                    | s:                 |                                       |                                                                                        | in water             |                      |           |      |
|                               | (flowering tops)      |                    | hyperforin         |                                       |                                                                                        |                      |                      |           |      |
|                               |                       |                    | adhyperforin       |                                       |                                                                                        |                      |                      |           |      |
|                               |                       |                    | cinnamic acids     |                                       |                                                                                        |                      |                      |           |      |
|                               |                       |                    | 3-O-caffeoylquinic |                                       |                                                                                        |                      |                      |           |      |
|                               |                       |                    | acid               |                                       |                                                                                        |                      |                      |           |      |
|                               |                       |                    | p-cumaroylquinic   |                                       |                                                                                        |                      |                      |           |      |
|                               |                       |                    | acid               |                                       |                                                                                        |                      |                      |           |      |
|                               |                       |                    | 5-O-caffeoylquinic |                                       |                                                                                        |                      |                      |           |      |
|                               |                       |                    | acid               |                                       |                                                                                        |                      |                      |           |      |
|                               |                       |                    | p-Coumaric acid    |                                       |                                                                                        |                      |                      |           |      |

| LC-MS and LC-MS/MS Techniques |                        |                    |                                                                                                                                                                                                                                                                 |                       |                                                                                        |                |                      |           |      |
|-------------------------------|------------------------|--------------------|-----------------------------------------------------------------------------------------------------------------------------------------------------------------------------------------------------------------------------------------------------------------|-----------------------|----------------------------------------------------------------------------------------|----------------|----------------------|-----------|------|
| No.                           | Plant                  | Class of Compounds | Compounds Specific                                                                                                                                                                                                                                              | Application           | Chromatographic column Chemistry, length X diameter (mm X mm), particle dimension (µm) | Mobile Phase   | Analysis time (min.) | Detection | Ref. |
|                               |                        |                    | flavonoids:<br>catechin<br>quercetin-3-O-rutinoside<br>myricetin-3-O-rhamnoside<br>quercetin-3-O-galactoside<br>quercetin-3-O-glucoside<br>quercetin-3-O-arabinoside<br>quercetin-3-O-rhamnoside<br>quercetin<br><br>biflavones:<br>biapigenin<br>amentoflavone |                       |                                                                                        |                |                      |           |      |
| 23.                           | <i>H. hengshanense</i> | phloroglucinol     | Multiple – 52                                                                                                                                                                                                                                                   | UPLC-QToF-MS chemical | C18, 100 X 2.1, 1.7                                                                    | A-10mM aqueous | 16                   | ESI -     | [42] |

| LC-MS and LC-MS/MS Techniques |                          |                    |                    |                                     |                                                                                        |                       |                      |                 |      |
|-------------------------------|--------------------------|--------------------|--------------------|-------------------------------------|----------------------------------------------------------------------------------------|-----------------------|----------------------|-----------------|------|
| No.                           | Plant                    | Class of Compounds | Compounds Specific | Application                         | Chromatographic column Chemistry, length X diameter (mm X mm), particle dimension (µm) | Mobile Phase          | Analysis time (min.) | Detection       | Ref. |
|                               | <i>H. petiolulatum</i>   | derivatives        | compounds          | profiling and characterization      |                                                                                        | ammonium acetate      |                      | ESI +           |      |
|                               | <i>subsp.</i>            | flavonoids         |                    | of antiproliferative and            |                                                                                        | buffer, adjusted to   |                      | Q-TOF           |      |
|                               | <i>yunnanense</i>        | chromones          |                    | anti-inflammatory compounds         |                                                                                        | pH=5.0 with formic    |                      | Full scan       |      |
|                               | <i>H. seniawinii</i>     | glycerophospholip  |                    | from seven <i>Hypericum</i> species |                                                                                        | B-acetonitrile:-metha |                      | m/z             |      |
|                               | <i>H. daliense</i>       | ids                |                    | in PR China                         |                                                                                        | nol (9:1)             |                      | 100-1500        |      |
|                               | <i>H. himalaicum</i>     |                    |                    |                                     |                                                                                        |                       |                      | MS <sup>+</sup> |      |
|                               | <i>H. wightianum</i>     |                    |                    |                                     |                                                                                        |                       |                      |                 |      |
|                               | <i>H. japonicum</i>      |                    |                    |                                     |                                                                                        |                       |                      |                 |      |
|                               | <i>H. perforatum</i>     |                    |                    |                                     |                                                                                        |                       |                      |                 |      |
|                               | (aerial parts and roots) |                    |                    |                                     |                                                                                        |                       |                      |                 |      |

**Table S3.** GC, GC-MS and GC-MS/MS Techniques for the analysis of Hypericum Species.

| GC, GC-MS and GC-MS/MS techniques |                                                                                                                               |                                            |                                                                                                                                                                                                                                                                                   |                                                                                         |                                                    |                |                     |           |                                                                    |      |
|-----------------------------------|-------------------------------------------------------------------------------------------------------------------------------|--------------------------------------------|-----------------------------------------------------------------------------------------------------------------------------------------------------------------------------------------------------------------------------------------------------------------------------------|-----------------------------------------------------------------------------------------|----------------------------------------------------|----------------|---------------------|-----------|--------------------------------------------------------------------|------|
| No.                               | Plant                                                                                                                         | Class of Compounds                         | Compounds Specific                                                                                                                                                                                                                                                                | Application                                                                             | Chromatographic column Chemistry, length (m), type | Vector Gas     | Analysis Time (min) | Detection | Identification/Quantification                                      | Ref. |
| 1.                                | <i>H. perforatum</i> ,<br><i>H. perforatum</i> ,<br><i>H. tomentosum</i><br><i>H. ericoides</i><br>(aerial parts, top of 2/3) | fatty acids-total and specific tocopherols | caprylic acid<br>capric acid<br>lauric acid<br>myristic acid<br>palmitic acid<br>palmitoleic acid<br>stearic acid<br>oleic acid<br>linoleic acid<br>a-linolenic acid<br>arachidic acid<br>behenic acid<br>saturated fatty acids (SFA)<br>unsaturated fatty acids (UFA)<br>SFA/UFA | Fatty acid composition and tocopherol content in four Tunisian <i>Hypericum</i> species | RT-2560, 100, capillary                            | N <sub>2</sub> | 97                  | FID       | comparison of the retention time with those of reference standards | [66] |
| 2.                                | <i>H. perforatum</i><br>(the top of 2/3 plants)                                                                               | essential oils<br>fatty acids              | 168 compounds                                                                                                                                                                                                                                                                     | Altitudinal impacts on chemical content and                                             | CP-5MS, 30, film coated capillary column           | He             | 120                 | MS-EI     | fragmentation patterns<br>Kovats index                             | [47] |

| GC, GC-MS and GC-MS/MS techniques |                                       |                                     |                                                                                                                        |                                                                                                                            |                                                        |            |                     |           |                                                                       |      |
|-----------------------------------|---------------------------------------|-------------------------------------|------------------------------------------------------------------------------------------------------------------------|----------------------------------------------------------------------------------------------------------------------------|--------------------------------------------------------|------------|---------------------|-----------|-----------------------------------------------------------------------|------|
| No.                               | Plant                                 | Class of Compounds                  | Compounds Specific                                                                                                     | Application                                                                                                                | Chromatographic column Chemistry, length (m), type     | Vector Gas | Analysis Time (min) | Detection | Identification/Quantification                                         | Ref. |
|                                   |                                       |                                     |                                                                                                                        | composition of <i>H. perforatum</i>                                                                                        |                                                        |            |                     |           |                                                                       |      |
|                                   |                                       |                                     |                                                                                                                        |                                                                                                                            |                                                        |            |                     |           |                                                                       |      |
| 3.                                | <i>H. perforatum</i> (dried leaves)   | monosaccharides<br>polysaccharides  | mono-saccharides<br>L-arabinose<br>D-galactose<br>rhamnose<br>mannose,<br>glucose<br>xylose                            | Characterization of <i>H. perforatum</i> polysaccharides with antioxidant and antimicrobial activities<br>alditol acetates | HP-5MS, 30, film coated capillary column               | He         | 47                  | MS        | -                                                                     | [21] |
| 4.                                | <i>H. calycinum</i> (cell cultures)   | different benzoic acids derivatives | benzoic acid derivatives<br>transcinnamic acid<br>trimethylsilyl (TMS)<br>derivatization of the acidic protons present | Involvement of Cytosolic aromatic aldehyde dehydrogenase for xanthone biosynthesis starting from benzoic acid derivatives  | ZB-5MS, 30, film coated capillary column               | He         | 18                  | MS        | identification of transcinnamic acid based on standard and MS spectra | [54] |
| 5.                                | <i>H. perforatum</i> (shoot cultures) | terpenes (monoterpenes and          | 35 compounds                                                                                                           | Biological confirming that nano-perlite and                                                                                | HP-5MS-dimethylpolysiloxan, 30, fused silica capillary | He         | 65                  | MS-EI     | -                                                                     | [55] |

| GC, GC-MS and GC-MS/MS techniques |                                     |                                                         |                    |                                                                                                          |                                                       |            |                     |           |                                                                                                                                              |      |
|-----------------------------------|-------------------------------------|---------------------------------------------------------|--------------------|----------------------------------------------------------------------------------------------------------|-------------------------------------------------------|------------|---------------------|-----------|----------------------------------------------------------------------------------------------------------------------------------------------|------|
| No.                               | Plant                               | Class of Compounds                                      | Compounds Specific | Application                                                                                              | Chromatographic column Chemistry, length (m), type    | Vector Gas | Analysis Time (min) | Detection | Identification/ Quantification                                                                                                               | Ref. |
|                                   |                                     | sesquiterpenes )<br>fatty acids<br>hydrocarbons         |                    | MnO <sub>2</sub> /perlite to H. perforatum have positive effects                                         |                                                       |            |                     |           |                                                                                                                                              |      |
|                                   |                                     |                                                         |                    |                                                                                                          |                                                       |            |                     |           | GC linear retention indices (RI)                                                                                                             |      |
|                                   |                                     |                                                         |                    |                                                                                                          |                                                       |            |                     |           | reference to a homologous series C <sub>5</sub> –C <sub>32</sub> n-alkanes                                                                   |      |
| 6.                                | <i>H. perforatum</i> (aerial parts) | essential oils<br>fatty acids<br>long chain<br>alcohols | 72 compounds       | Solvent-free microwave extraction influence VS conventional hydrodistillation over types and oil content | Elite 5MS non-polar, 30, film coated capillary column | He         | 110                 | MS-EI     | comparison of the mass spectral with those stored in the MS database<br><br>percentage composition-summation of peak areas of the total oil. | [67] |
| 7.                                | <i>H. perforatum</i>                | fatty acids                                             |                    | Characterization of                                                                                      | ZB-WAX, 30, film                                      | He         | 80                  | FID       | identification                                                                                                                               | [63] |

| GC, GC-MS and GC-MS/MS techniques |                                                                                           |                                             |                    |                                                                                                                                             |                                                                                                       |                          |                     |                           |                                                                                                                                     |      |
|-----------------------------------|-------------------------------------------------------------------------------------------|---------------------------------------------|--------------------|---------------------------------------------------------------------------------------------------------------------------------------------|-------------------------------------------------------------------------------------------------------|--------------------------|---------------------|---------------------------|-------------------------------------------------------------------------------------------------------------------------------------|------|
| No.                               | Plant                                                                                     | Class of Compounds                          | Compounds Specific | Application                                                                                                                                 | Chromatographic column Chemistry, length (m), type                                                    | Vector Gas               | Analysis Time (min) | Detection                 | Identification/Quantification                                                                                                       | Ref. |
|                                   | (the top 6 cm comprising the flowers)                                                     | (methyl esters)                             |                    | <i>H. perforatum</i> macerates prepared with different fatty oils phytochemical profile of oil extracts comprising fatty acids and terpenes | coated capillary column on-column derivatization with trimethylsulfonium hydroxide (TMSH)             |                          |                     | MS-EI                     | relative to standards, mass spectra in NIST data-base, determination of average chain length                                        |      |
| 8.                                | <i>H. asperulum</i><br><i>H. scabrum</i><br><i>H. vermiculare</i> (aerial part of plants) | essential oils                              | 78 compounds       | Essential oil composition of three Iranian <i>Hypericum</i> species collected from different habitat conditions                             | GC-FID<br>VF-5MS, 30, film coated capillary column<br>GC-MS<br>HP-5, 30, film coated capillary column | He                       | 75                  | FID<br>MS<br>(m/z 40-400) | mixture of n-alkanes (C8–C40)<br>arithmetic retention index (AI) of peaks.<br>MSD ChemStation<br>NIST Mass Spectral peak assignment | [75] |
| 9.                                | <i>H. lydium</i><br><i>H. orientale</i><br><i>H. confertum</i>                            | essential oils<br>hydrocarbons<br>aldehydes | 80 compounds       | <i>Hypericum spp.</i> volatile profiling and the potential                                                                                  | HP-WAX, 30, film coated capillary                                                                     | GC-FID<br>N <sub>2</sub> | GC-FID<br>42        | FID<br>MS-ion trap        | reference standards<br>linear retention indices relative to                                                                         | [73] |

| GC, GC-MS and GC-MS/MS techniques |                                                                                                                                                                                                                                                          |                                                                                                                            |                                                                                                                                                                                          |                                                                                                                                                                                       |                                                                                                             |             |                     |           |                                                                |      |
|-----------------------------------|----------------------------------------------------------------------------------------------------------------------------------------------------------------------------------------------------------------------------------------------------------|----------------------------------------------------------------------------------------------------------------------------|------------------------------------------------------------------------------------------------------------------------------------------------------------------------------------------|---------------------------------------------------------------------------------------------------------------------------------------------------------------------------------------|-------------------------------------------------------------------------------------------------------------|-------------|---------------------|-----------|----------------------------------------------------------------|------|
| No.                               | Plant                                                                                                                                                                                                                                                    | Class of Compounds                                                                                                         | Compounds Specific                                                                                                                                                                       | Application                                                                                                                                                                           | Chromatographic column Chemistry, length (m), type                                                          | Vector Gas  | Analysis Time (min) | Detection | Identification/Quantification                                  | Ref. |
|                                   | (aerial parts)                                                                                                                                                                                                                                           | hydrocarbon<br>monoterpenes<br>oxygenated<br>monoterpenes<br>hydrocarbon<br>sesquiterpenes<br>oxygenated<br>sesquiterpenes |                                                                                                                                                                                          | significance in the<br>quality control of<br>new valuable raw<br>material                                                                                                             | columns<br>HP-5, 30, film coated<br>capillary column<br>GC-MS<br>DB-5, 30, film coated<br>capillary columns | GC-MS<br>He | GC-MS<br>60         |           | n-hydrocarbons<br>library mass spectra<br>NIST 98 and<br>ADAMS |      |
| 10.                               | <i>H. perforatum</i><br><i>H. annulatum</i><br><i>H. calycinum</i><br><i>H. hirsutum</i><br><i>H. hookerianum</i><br><i>H. humifusum</i><br><i>H. maculatum</i><br><i>H. olympicum</i><br><i>H. pseudohenryi</i><br>(aerial<br>part-flowerin<br>g phase) | secondary<br>metabolites<br>naphthodianth<br>rones<br>flavonoids<br>phenolic acids                                         | hyperforin<br>pseudohypericin<br>n<br>hypericin<br>rutin<br>hyperoside<br>amentoflavone<br>(-)-epicatechin<br>(+)-catechin<br>chlorogenic<br>acid<br>neochlorogenic<br>acid<br>quercetin | Phytochemical<br>profile of<br><i>Hypericum</i> plants,<br>Identification of<br>potential marker<br>distinguishing<br><i>H. perforatum</i> from<br>other <i>Hypericum</i><br>species. | HP-5, 30, film coated<br>capillary column                                                                   | He          | 18                  | FID       | reference standards                                            | [69] |

| GC, GC-MS and GC-MS/MS techniques |                                                                                                      |                          |                                                                                                            |                                                                                                    |                                                                    |            |                     |                    |                                                                        |      |
|-----------------------------------|------------------------------------------------------------------------------------------------------|--------------------------|------------------------------------------------------------------------------------------------------------|----------------------------------------------------------------------------------------------------|--------------------------------------------------------------------|------------|---------------------|--------------------|------------------------------------------------------------------------|------|
| No.                               | Plant                                                                                                | Class of Compounds       | Compounds Specific                                                                                         | Application                                                                                        | Chromatographic column Chemistry, length (m), type                 | Vector Gas | Analysis Time (min) | Detection          | Identification/Quantification                                          | Ref. |
| 11.                               | <i>H. perforatum</i><br>(aerial parts)                                                               |                          | quercitrin                                                                                                 |                                                                                                    |                                                                    |            |                     |                    |                                                                        |      |
|                                   |                                                                                                      |                          | isoquercetin                                                                                               |                                                                                                    |                                                                    |            |                     |                    |                                                                        |      |
|                                   |                                                                                                      |                          | Structural elucidation                                                                                     | Structural elucidation                                                                             |                                                                    |            |                     |                    |                                                                        |      |
|                                   |                                                                                                      |                          | two novel $\beta$ -diketones, 2,6,9-trimethyl-8-decene-3,5-dione and 3,7,10-trimethyl-9-undecene-4,6-dione | identification of two novel prenylated $\beta$ -diketones, structurally related to (ad)hyperforin. | DB-5MS (5% phenylmethylsiloxane), 30, film coated capillary column | He         | 79                  | MS-EI (m/z 35-850) | spectra based elucidation                                              | [35] |
| 12.                               | <i>H. reflexum</i><br><i>H. canariense</i><br><i>H. grandifolium</i><br>(top flowering aerial parts) | essential oils           |                                                                                                            |                                                                                                    | GC-FID                                                             |            |                     |                    | identification by                                                      |      |
|                                   |                                                                                                      | alkanes                  |                                                                                                            |                                                                                                    | HP-5 (5%                                                           |            |                     |                    | co-injection with                                                      |      |
|                                   |                                                                                                      | monoterpene hydrocarbons |                                                                                                            | Phytochemical analysis and in vitro biological activity of three                                   | phenylmethylpolysiloxane, 30. film coated capillary column         |            | GC-FID 65           | FID                | authentic standards                                                    |      |
|                                   |                                                                                                      | oxygenated monoterpenes  | 160 compounds                                                                                              | Hypericum species from the Canary Islands                                                          | GC-MS HP-5 MS (5% phenylmethylpolysiloxane, 30, film coated        | He         | GC-MS 65            | MS-EI              | FID peak-area internal normalization without using correction factors. | [19] |

| GC, GC-MS and GC-MS/MS techniques |                                                                                                                                                                                 |                                                                           |                                                                         |                                                                                                         |                                                                    |            |                     |                              |                                                                                                                                           |      |
|-----------------------------------|---------------------------------------------------------------------------------------------------------------------------------------------------------------------------------|---------------------------------------------------------------------------|-------------------------------------------------------------------------|---------------------------------------------------------------------------------------------------------|--------------------------------------------------------------------|------------|---------------------|------------------------------|-------------------------------------------------------------------------------------------------------------------------------------------|------|
| No.                               | Plant                                                                                                                                                                           | Class of Compounds                                                        | Compounds Specific                                                      | Application                                                                                             | Chromatographic column Chemistry, length (m), type                 | Vector Gas | Analysis Time (min) | Detection                    | Identification/Quantification                                                                                                             | Ref. |
|                                   |                                                                                                                                                                                 |                                                                           |                                                                         |                                                                                                         | capillary column                                                   |            |                     |                              | MS data consisting the computer matching with the WILEY275, NIST 08 ADAMS, FFNSC 2 and                                                    |      |
| 13.                               | <i>H. perforatum</i><br><i>ssp. veronense</i><br><i>H. perfoliatum</i><br><i>H. empetrifolium</i><br><i>ssp. empetrifolium</i> ,<br><i>H. triquetrifolium</i><br>(aerial parts) | volatile metabolites in essential oils                                    | 113 compounds                                                           | Metabolomic fingerprinting and genetic discrimination of four <i>Hypericum</i> taxa from Greece         | HP-5 MS, 30, film coated capillary column                          | He         | 81                  | MS                           | retention indices series of alkane standards (C8–C40)<br>library-NIST/EPA/NIH Mass Spectral Library, Version 2.0d; NIST, Gaithersburg, MD | [48] |
| 14.                               | <i>H. rochelii</i><br><i>H. umbellatum</i><br>(fresh aerial parts)                                                                                                              | monoterpene hydrocarbon oxygenated monoterpenes sesquiterpene hydrocarbon | <i>H. rochelii</i> -79 compounds<br><i>H. umbellatum</i> -126 compounds | The chemical composition and antimicrobial activity studies on the essential oils of <i>H. rochelii</i> | HP-5MS (5% phenylmethylsiloxane), 30, film coated capillary column | He         | 54                  | FID<br>MS-EI<br>(m/z 35-500) | oil constituents-linear retention indices (relative to n-alkanes)                                                                         | [74] |

| GC, GC-MS and GC-MS/MS techniques |                                                                                                                 |                                                                     |                                                                                                             |                                                                                                                       |                                                    |            |                     |                    |                                                                                                                                                       |      |
|-----------------------------------|-----------------------------------------------------------------------------------------------------------------|---------------------------------------------------------------------|-------------------------------------------------------------------------------------------------------------|-----------------------------------------------------------------------------------------------------------------------|----------------------------------------------------|------------|---------------------|--------------------|-------------------------------------------------------------------------------------------------------------------------------------------------------|------|
| No.                               | Plant                                                                                                           | Class of Compounds                                                  | Compounds Specific                                                                                          | Application                                                                                                           | Chromatographic column Chemistry, length (m), type | Vector Gas | Analysis Time (min) | Detection          | Identification/ Quantification                                                                                                                        | Ref. |
|                                   |                                                                                                                 | oxygenated sesquiterpenes diterpenoids triterpenoids non-terpenoids |                                                                                                             | and H. umbellatum                                                                                                     |                                                    |            |                     |                    | mass spectra comparison with those of authentic standards, Wiley 6, NIST02, MassFinder 2.3 homemade MS library with the spectra corresponding to pure |      |
| 15.                               | <i>H. perforatum</i> ,<br><i>H. hookerianum</i><br><i>H. bellum</i><br><i>H. pseudohenryi</i><br>(aerial parts) | multiple compounds                                                  | <i>H. perforatum</i> -56 compounds<br><i>H. hookerianum</i> -71 compounds<br><i>H. bellum</i> -43 compounds | Chemical characterization, neuroprotective, antimicrobial and enzyme inhibitory activities of Hypericum volatile oils | SLB-5 MS, 10, fused-silica capillary column        | He         | 46.5                | MS-EI (m/z 30-500) | retention index relative to a series of n-alkanes (C7-C30).<br>mass spectrum library with reference to Wiley 275 and NIST 2017 databases              | [17] |

| GC, GC-MS and GC-MS/MS techniques |                                                              |                                                                                                                            |                                   |                                                                                                                         |                                                                                                            |                             |                               |                              |                                                                                                                                                                                                                               |      |
|-----------------------------------|--------------------------------------------------------------|----------------------------------------------------------------------------------------------------------------------------|-----------------------------------|-------------------------------------------------------------------------------------------------------------------------|------------------------------------------------------------------------------------------------------------|-----------------------------|-------------------------------|------------------------------|-------------------------------------------------------------------------------------------------------------------------------------------------------------------------------------------------------------------------------|------|
| No.                               | Plant                                                        | Class of Compounds                                                                                                         | Compounds Specific                | Application                                                                                                             | Chromatographic column Chemistry, length (m), type                                                         | Vector Gas                  | Analysis Time (min)           | Detection                    | Identification/Quantification                                                                                                                                                                                                 | Ref. |
|                                   |                                                              |                                                                                                                            | H. pseudohenryi,-5<br>7 compounds |                                                                                                                         |                                                                                                            |                             |                               |                              |                                                                                                                                                                                                                               |      |
| 16.                               | <i>H. perforatum</i><br>(aerial parts<br>flowering<br>stage) | monoterpenes<br>hydrocarbons<br>oxygenated<br>monoterpenes<br>sesquiterpene<br>hydrocarbons<br>oxygenated<br>sesquiterpens | 46 compounds                      | Chemical<br>characterization of<br>the essential oil<br>compositions from<br>Iranian<br>populations of H.<br>perforatum | GC-FID<br>BP5, 30, film coated<br>capillary column<br>GC-MS<br>HP-5MS, 30, film coated<br>capillary column | GC-FID<br>He<br>GC-MS<br>He | GC-FID<br>75<br>GC-MS<br>20.6 | FID<br>MS-EI<br>(m/z 50-550) | authentic standards<br>chromatographic<br>linear retention<br>indices, determined<br>relative to a series of<br>n-alkanes (C8 C30)<br>MS data matching<br>with the WILEY275,<br>NIST 05, ADAMS,<br>and a home-made<br>library | [76] |
